1 **Post-phagocytosis activation of NLRP3 inflammasome by two novel T6SS**  
2 **effectors**

3

4 Hadar Cohen<sup>1</sup>, Noam Baram<sup>1</sup>, Chaya M. Fridman<sup>1</sup>, Liat Edry-Botzer<sup>1</sup>, Dor Salomon<sup>1\*</sup>  
5 and Motti Gerlic<sup>1\*</sup>

6

7 <sup>1</sup>Department of Clinical Microbiology and Immunology, Sackler Faculty of Medicine,  
8 Tel Aviv University, Tel Aviv 6997801, Israel.

9

10 Lead Contact: Motti Gerlic PhD, Department of Clinical Microbiology and  
11 Immunology, Sackler Faculty of Medicine, Tel Aviv University, Tel Aviv 69978, Israel.  
12 Tel. (Office): +972-3-640-9400, Fax: +972-3-640-9160, e-mail:  
13 mgerlic@tauex.tau.ac.il

14

15 \*Corresponding authors: Dor Salomon PhD (D.S) and Motti Gerlic (M.G) PhD,  
16 Department of Clinical Microbiology and Immunology, Sackler Faculty of Medicine,  
17 Tel Aviv University, Tel Aviv 69978, Israel. Tel. (Office): +972-3-640-7636, e-mails:  
18 dorsalomon@mail.tau.ac.il, mgerlic@tauex.tau.ac.il; ORCID: <https://orcid.org/0000-0002-2009-9453> and <https://orcid.org/0000-0001-9518-1833>, respectively.

20

## 21 **Summary**

22       The type VI secretion system (T6SS) is used by bacteria to deliver toxic  
23 effectors directly into target cells. Most T6SSs mediate antibacterial activities,  
24 whereas the potential anti-eukaryotic role of T6SS remains understudied. Here, we  
25 found a *Vibrio* T6SS that delivers two novel effectors into mammalian host immune  
26 cells. We showed that these effectors induce a pyroptotic cell death in a  
27 phagocytosis-dependent manner; we identified the NLRP3 inflammasome as being  
28 the underlying mechanism leading to the T6SS-induced pyroptosis. Moreover, we  
29 identified a compensatory T6SS-induced pathway that is activated upon inhibition of  
30 the canonical pyroptosis pathway. Genetic analyses revealed possible horizontal  
31 spread of this T6SS and its anti-eukaryotic effectors into emerging pathogens in the  
32 marine environment. Our findings reveal novel T6SS effectors that activate the host  
33 inflammasome and possibly contribute to virulence and to the emergence of bacterial  
34 pathogens.

35

## 36 **Keywords**

37 T6SS, *Vibrio*, Secretion system, cell death, pyroptosis, IL-1 $\beta$ , Caspase-1,  
38 Gasdermin, GSDMD, GSDME.

39

## 40 **Introduction**

41 Innate immune responses combat infections but may also drive pathological  
42 inflammation. The innate immune system engages an array of pattern-recognition  
43 receptors (PRR) that are expressed by cells found at the defensive front line against  
44 infections, including macrophages, dendritic cells, neutrophils, and others. PRRs can  
45 detect a variety of microbial determinants termed pathogen-associated molecular  
46 patterns (PAMPs). Moreover, damaged host cells can also trigger PRRs by releasing  
47 danger-associated molecular patterns (DAMPs) (Wallach et al., 2014; Wen et al.,  
48 2013).

49         Some PRRs of the innate immune system are assembled into a high-molecular  
50 weight complex called “the inflammasome” after sensing DAMPs or PAMPs.  
51 Inflammasome complexes are considered central components of innate immunity  
52 because of their ability to kill an infected cell (a cell death process that is termed  
53 pyroptosis), or by their activation and the subsequent secretion of mature pro-  
54 inflammatory cytokines interleukin 1 $\beta$  (IL-1 $\beta$ ) and IL-18 (Lamkanfi and Dixit, 2014;  
55 Schroder and Tschopp, 2010) Inflammasomes can be divided into: (1) a canonical  
56 pathway in which Caspase-1 is cleaved into a catalytically active enzyme, and (2)  
57 non-canonical pathways in which Caspase-11 is activated (Lamkanfi and Dixit,  
58 2014). The canonical inflammasome comprises one of the nucleotide-binding  
59 oligomerization domain (NOD), leucine-rich repeat (LRR)-containing protein (NLR)  
60 family members, including NLRP1, NLRP3, NLRC4 or the DNA sensor absent in  
61 melanoma 2 (AIM2), all of which contain either a pyrin domain (PYD) or a caspase  
62 recruitment domain (CARD) (Schroder and Tschopp, 2010). These domains interact  
63 with apoptosis-associated speck-like protein (ASC), leading to its polymerization into  
64 large helical filaments known as ASC specks by facilitating self-interactions of the

65 PYD of ASC (Franklin et al., 2014; Proell et al., 2013). The CARD domain of the  
66 ASC specks recruits Caspase-1 via a CARD-CARD interaction, leading to Caspase-  
67 1 clustering that permits autocleavage and formation of the active Caspase-1  
68 p10/p20 tetramer (Lamkanfi and Dixit, 2014). Activated Caspase-1 processes pro-IL-  
69 1 $\beta$  and pro-IL-18 into their mature forms. Simultaneously, activated Caspase-1  
70 cleaves gasdermin D (GSDMD) into a C-terminal fragment (GSDMD-CT) and N-  
71 terminal fragment (GSDMD-NT) (Liu et al., 2016; Shi et al., 2015). GSDMD-NT  
72 oligomerizes in membranes to form pores which promote IL-1 $\beta$  release and  
73 pyroptotic cell death (Lieberman et al., 2019; Liu et al., 2016).

74 The type VI secretion system (T6SS) is a widespread macromolecular protein  
75 secretion apparatus that translocates proteins into neighboring cells in a contact-  
76 dependent manner (Bingle et al., 2008; Boyer et al., 2009; Mougous et al., 2006;  
77 Pukatzki et al., 2006). Most of the T6SS-secreted proteins are toxic effectors capable  
78 of manipulating target cells. Although many T6SS effectors are antibacterial toxins,  
79 some T6SSs deliver effectors with anti-eukaryotic activities into host cells, thus  
80 promoting virulence or defense against predation (Monjarás Feria and Valvano,  
81 2020). Nevertheless, the anti-eukaryotic potential of T6SSs remains understudied  
82 and possibly underappreciated (Dar et al., 2018; Hachani et al., 2016).

83 T6SS is common in vibrios (Dar et al., 2018), a genus of Gram-negative marine  
84 bacteria that includes many established and emerging human pathogens (e.g. *Vibrio*  
85 *cholerae*, *Vibrio parahaemolyticus*, and *Vibrio vulnificus*), which are a leading cause of  
86 gastroenteritis and wound infections (Baker-Austin et al., 2018). Vibrios preferentially  
87 grow in warm (>15°C) marine environments; remarkably, the rise in sea surface  
88 temperatures correlates with the spread of vibrios and with *Vibrio*-associated human  
89 illness (Roux et al., 2015; Vezzulli et al., 2016).

90 *Vibrio proteolyticus* (*V. proteolyticus*) is a Gram-negative marine bacterium that  
91 was isolated from diseased corals (Cervino et al., 2008); it was also shown to cause  
92 mortality in fish (Bowden et al., 2018) and in the crustacean model organism,  
93 *Artemia* (Verschuere et al., 2000). *V. proteolyticus* does not possess a type III  
94 secretion system (T3SS) that can mediate delivery of effector proteins directly into  
95 host cells (Miller et al., 2019; Ray et al., 2016). Nevertheless, it encodes a secreted  
96 pore-forming hemolysin (Cohen et al., 2020; Ray et al., 2016) and three different  
97 T6SSs (T6SS1-3) (Ray et al., 2016, 2017). T6SS1 mediates both antibacterial and  
98 anti-eukaryotic activities, whereas T6SS3 does not play any role in bacterial  
99 competition and its hypothesized anti-eukaryotic potential remains to be investigated  
100 (Ray et al., 2017).

101 In a recent study in which we investigated the secreted *V. proteolyticus*  
102 cytotoxic hemolysin, VPRH, we observed the existence of another, VPRH-  
103 independent cell death that occurred only during infections of primary macrophages,  
104 but not in the cultured cell lines HeLa or RAW264.7 (Cohen et al., 2020). Thus, in  
105 this study, we set out to determine whether *V. proteolyticus* T6SSs can lead to cell  
106 death in primary macrophages, and if so, to decipher the underlying mechanism. We  
107 found that *V. proteolyticus* T6SS3, but not T6SS1, induced a phagocytosis-  
108 dependent cell death in bone marrow-derived macrophages (BMDMs). Using  
109 chemical and genetics approaches, we identified pyroptosis as the underlying  
110 mechanism of T6SS3-induced cell death, and specifically the NLRP3 inflammasome.  
111 Moreover, we found that a pathway comprising gasdermin E (GSDME) and caspase-  
112 3 compensates for GSDMD absence in response to T6SS3 activity, in a NLRP3-  
113 dependent manner. Lastly, we identified a new T6SS3 activator and two novel  
114 T6SS3 anti-eukaryotic effectors that are needed to induce inflammasome-mediated

115 cell death in BMDMs. Overall, our findings shed new light on the interplay between  
116 T6SS, phagocytosis and the NLRP3 inflammasome, and underscore the virulence  
117 potential of T6SSs.

118

## 119 **Results**

120

### 121 ***T6SS3 induces cell death in primary macrophages***

122 We previously showed that *V. proteolyticus* induces two types of cell death in  
123 BMDMs: (1) a rapid cell death that is mediated by the pore-forming hemolysin,  
124 VPRH, and (2) a slower cell death that is VPRH-independent (Cohen et al., 2020).  
125 The underlying mechanism driving the latter remains unknown. *V. proteolyticus*  
126 harbors three T6SSs (T6SS1-3). We hypothesized that one or more of these T6SSs  
127 are responsible for the observed VPRH-independent cell death. Previously, we  
128 showed that T6SS1 mediates interbacterial competition and manipulates the actin  
129 cytoskeleton in macrophages (Ray et al., 2017). We also proposed that T6SS3  
130 targets eukaryotic cells (Ray et al., 2017). Furthermore, we reported that T6SS1 and  
131 T6SS3 are functional under laboratory conditions; however, we did not detect any  
132 T6SS2 activating conditions (Ray et al., 2017). Therefore, we excluded T6SS2 from  
133 subsequent analyses, and we focused on a possible contribution of T6SS1 and  
134 T6SS3 to cell death in BMDMs.

135 To investigate the role of T6SS1 and T6SS3 in cell death, we first sought to  
136 further induce T6SS activity. We reasoned that if a T6SS is responsible for inducing  
137 cell death, then hyper-activating it would improve our ability to monitor the cell death  
138 phenotype by (1) maximizing its amplitude, (2) shortening the time to onset, and (3)  
139 allowing us to lower the multiplicity of infection (MOI). We previously reported that H-

140 NS, the histone-like nucleoid-structuring protein, is a negative regulator of T6SSs in  
141 vibrios and that its deletion results in hyper-activation of T6SS (Salomon et al., 2014,  
142 2015). Thus, we generated a *V. proteolyticus* strain with a deletion in a gene we  
143 named *hns1* (*VPR01S\_RS04360*); it encodes an H-NS that is very similar to  
144 VP1133, the previously studied H-NS protein from *V. parahaemolyticus* (Salomon et  
145 al., 2014). Importantly, the deletion was performed in a  $\Delta vprh$  background to allow  
146 the subsequent monitoring of VPRH-independent cell death. We then determined the  
147 effect of *hns1* deletion on T6SS1 and T6SS3 activity. To this end, we monitored the  
148 expression and secretion of VgrG1 and Hcp3, hallmark secreted tail tube  
149 components of T6SS1 and T6SS3, respectively. We found that *hns1* deletion  
150 resulted in elevated secretion of both VgrG1 and Hcp3, compared to their secretion  
151 from the parental  $\Delta vprh$  strain (**Figure 1a**). Notably, the secretion of VgrG1 and  
152 Hcp3 was T6SS1- and T6SS3-dependent, respectively, as evident from their  
153 absence in the supernatant fractions of strains deleted for *tssG1* (T6SS1<sup>-</sup>) and *tssL3*  
154 (T6SS3<sup>-</sup>), which are core structural genes required for the activity of T6SS1 and  
155 T6SS3, respectively. These results indicate that *hns1* deletion de-represses T6SS1  
156 and T6SS3, leading to their constitutive activation and thus elevated secretion.

157 Next, we used real-time microscopy (IncucyteZOOM) to monitor VPRH-  
158 independent cell death kinetics in BMDMs. Whereas infection with the  $\Delta vprh$  strain  
159 resulted in negligible cell death three hours post infection, the  $\Delta vprh/\Delta hns1$  mutant  
160 induced a rapid cell death in which ~80% of the cells in the culture were dead within  
161 this time frame (set as 100% Normalized Area Under the Curve (AUC); **Figure 1b,c**).  
162 Remarkably, the rapid cell death evident in the  $\Delta vprh/\Delta hns1$  mutant was completely  
163 abrogated upon genetic inactivation of T6SS3 ( $\Delta vprh/\Delta hns1/T6SS3^-$ ), but not upon  
164 genetic inactivation of T6SS1 ( $\Delta vprh/\Delta hns1/T6SS1^-$ ) (**Figure 1b,c**). Notably, genetic

165 inactivation of T6SS1 or T6SS3 had no significant effect on growth during the  
 166 relevant time frame compared to the parental  $\Delta vprh/\Delta hns1$  strain in either MLB or  
 167 DMEM media (**Figure 1d**), nor did it affect bacterial swimming motility (**Figure 1e**).  
 168 Taken together, these results suggest that T6SS3, but not T6SS1, mediates a  
 169 VPRH-independent cell death in BMDMs.

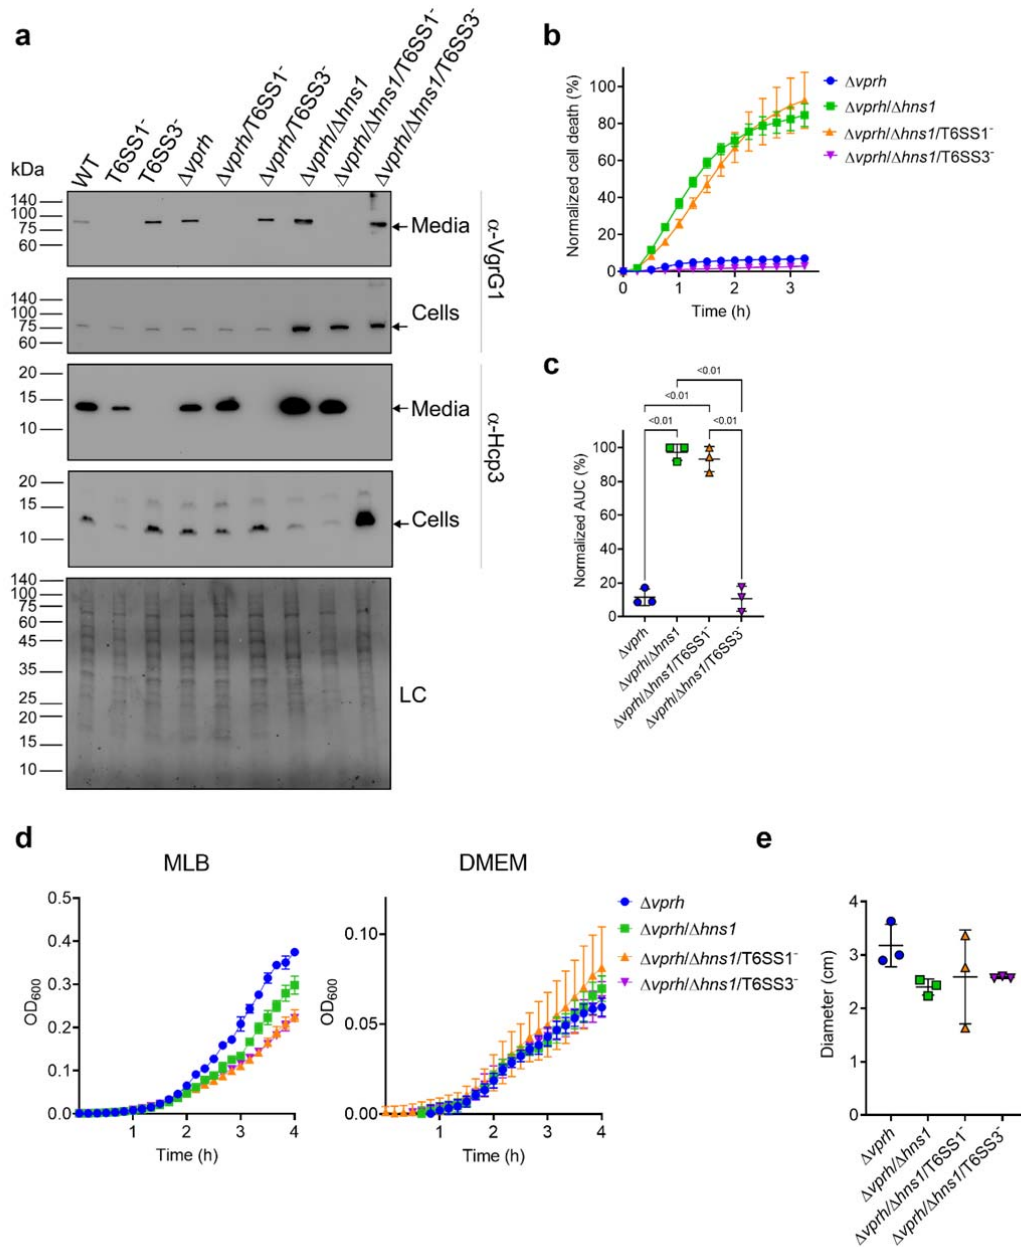

170



171 **Figure 1: T6SS3 induces cell death in primary macrophages**

172 (a) Expression (cells) and secretion (media) of Hcp3 and VgrG1 from the indicated  
173 *V. proteolyticus* strains were detected by immunoblotting using specific antibodies  
174 against Hcp3 and VgrG1, respectively. Loading control (LC) is shown for total protein  
175 lysate. **Arrows denote the expected band size.** (b-c) Assessment of cell death  
176 upon infection of BMDMs with *V. proteolyticus* strains. Approximately  $3.5 \times 10^4$   
177 BMDMs were seeded into 96-well plates in triplicate and were primed with LPS (100  
178 ng/mL) 3 hours prior to infection with *V. proteolyticus* strains at MOI 5. Propidium  
179 iodide (PI) was added to the medium prior to infection, and its kinetic uptake was  
180 assessed using real-time microscopy (IncucyteZOOM) (b) and then analyzed as the  
181 area under the curve (AUC) of the percentage of PI-positive cells normalized to the  
182 number of cells in the wells (c). (d) Growth of *V. proteolyticus* strains, used in (b), in  
183 MLB or DMEM media at 30°C or 37°C, respectively, measured as absorbance at 600  
184 nm (OD<sub>600</sub>). (e) Swimming motility of *V. proteolyticus* strains used in (b), measured  
185 as migration of a soft-agar plate after overnight incubation at 30°C. The data in (a, b,  
186 d) are a representative experiment out of 3 independent experiments. The data in (c)  
187 and (e) are the combined results of 3 independent experiments presented as the  
188 mean  $\pm$  SD. In (c) and (e), statistical comparisons between the different *V.*  
189 *proteolyticus* strains were performed using a one-way ANOVA, followed by Tukey's  
190 multiple comparison test. Significant *P* values (<0.05) are denoted above.

191

192 **T6SS3 induces pyroptotic cell death in BMDMs**

193 We previously demonstrated that a VPRH-independent cell death is observed upon  
194 infection of BMDMs, but not in HeLa cells or RAW 264.7 macrophages (Cohen et al.,  
195 2020). Unlike the two cell lines, BMDMs contain a functional cell death mechanism  
196 known as pyroptosis (Cohen et al., 2020; Proell et al., 2013). Pyroptosis is a form of  
197 necrotic and inflammatory regulated cell death induced by the inflammasome  
198 complex. Assembly of the inflammasome leads the maturation and secretion of pro-  
199 inflammatory cytokines, such as IL-1 $\beta$  (Man et al., 2017). Therefore, we  
200 hypothesized that inflammasome activation and pyroptosis are the mechanisms

201 underlying the VPRH-independent, T6SS3-dependent cell death in BMDMs. To test  
202 this hypothesis, we monitored the effect of specific inflammasome inhibitors on  
203 T6SS3-mediated cell death. Using real-time microscopy, we observed that addition  
204 of either inhibitors, MCC950 (blocks ASC oligomerization by inhibiting the canonical  
205 and non-canonical NLRP3 inflammasome (Shao et al., 2015)) or Vx765 (a potent  
206 and selective competitive inhibitor of Caspase-1 (Church et al., 2008)) resulted in  
207 delayed and reduced cell death during infection with  $\Delta vprh/\Delta hns1$  bacteria (~40%  
208 reduction as measured by calculating the AUC), compared with a DMSO-treated  
209 control (**Figure 2a,b**). As expected, inactivation of T6SS1 had no effect on  
210  $\Delta vprh/\Delta hns1$ -induced cell death nor on the protective effect of the inhibitors,  
211 whereas inactivation of T6SS3 abrogated the cell death phenotype. These results  
212 support our hypothesis that T6SS3 induces cell death in BMDMs via an  
213 inflammasome-dependent pyroptotic pathway.

214 Further support for this hypothesis was obtained by monitoring the cleavage  
215 and secretion of the inflammasome-dependent cytokine, IL-1 $\beta$ , upon infection with *V.*  
216 *proteolyticus* strains. As shown in **Figure 2c-e**, IL-1 $\beta$  cleavage and secretion were  
217 dependent on the presence of a functional T6SS3 in  $\Delta vprh/\Delta hns1$  strains, and they  
218 were inhibited (**Figure 2c**) or undetected (**Figure 2d,e**) when inflammasome  
219 inhibitors were added. However, secretion of TNF $\alpha$  (an NF- $\kappa$ B-dependent,  
220 inflammasome-independent cytokine) was independent of T6SS3 activity and was  
221 unaffected by addition of inflammasome inhibitors (**Figure 2c**). Additional hallmark  
222 pyroptotic processes, such as the cleavage and release of Caspase-1 and GSDMD,  
223 were apparent upon infection of BMDMs with the  $\Delta vprh/\Delta hns1$  strain; however, they  
224 were undetected upon inactivation of T6SS3 or upon the addition of inflammasome

225 inhibitors (**Figure 2d,e**). Taken together, these results suggest that T6SS3 induces  
226 an inflammasome-dependent, pyroptotic cell death in BMDMs

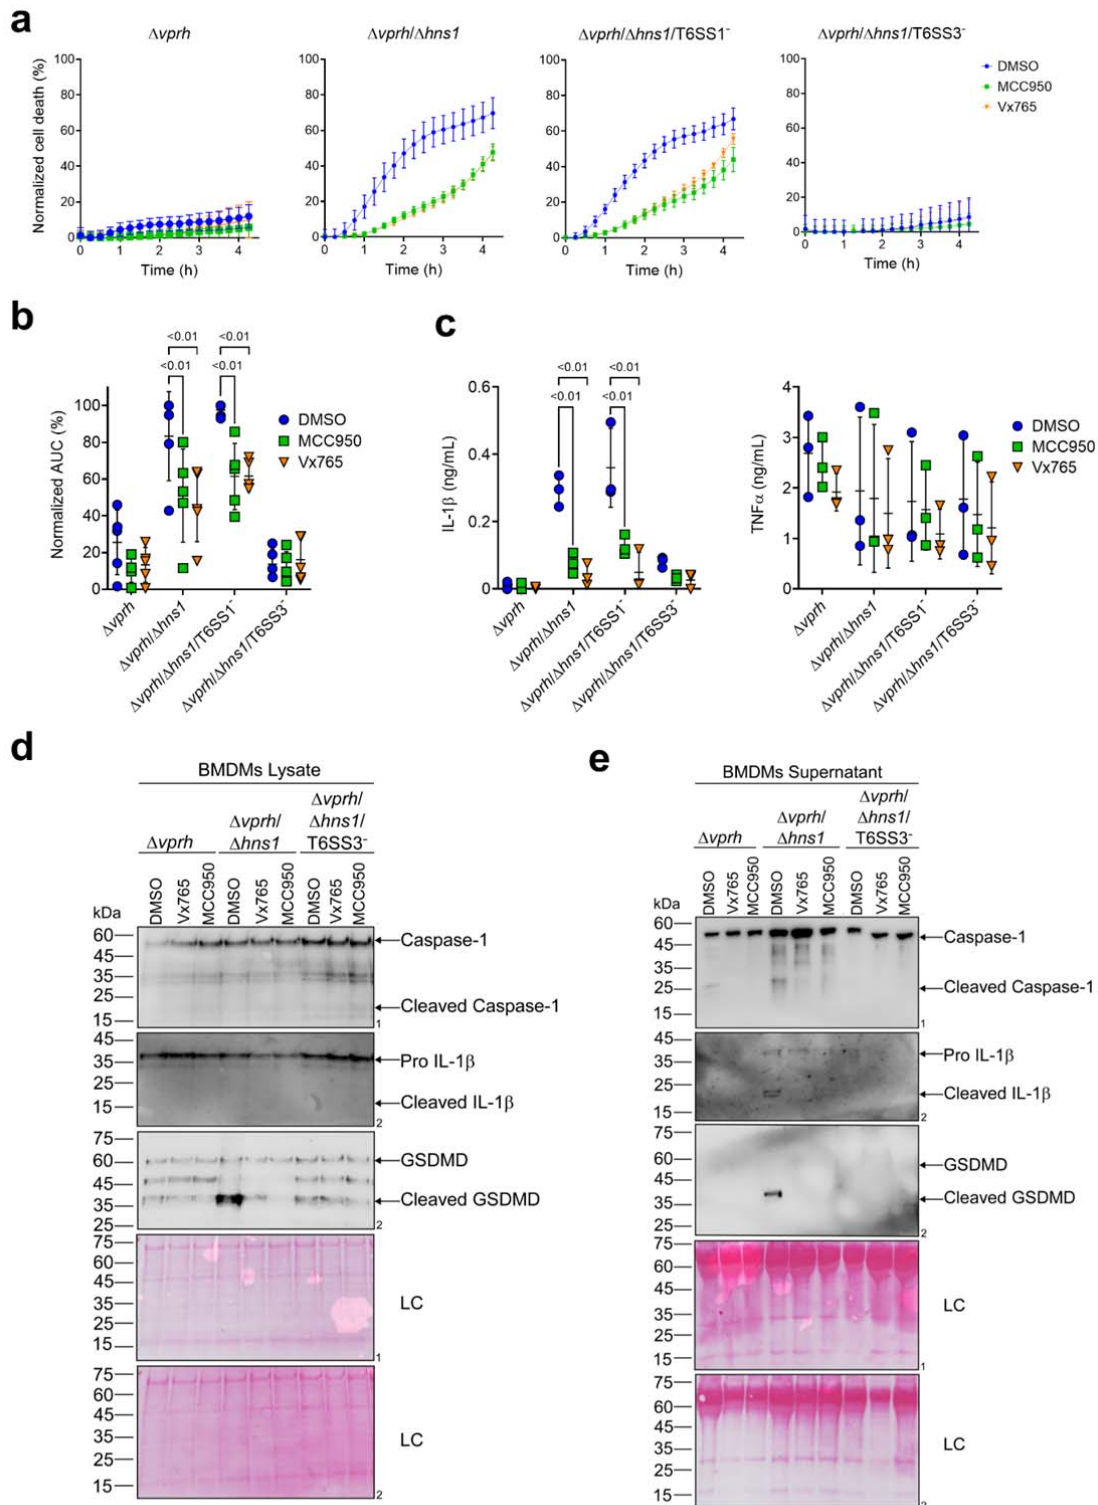

227

228 **Figure 2: T6SS3 induces pyroptotic cell death in BMDMs**

229 Approximately  $3.5 \times 10^4$  wild-type BMDMs were seeded into 96-well plates in 6  
 230 replicates and were primed using LPS (100 ng/mL) for 3 hours prior to infection with

231 *V. proteolyticus* strains at MOI 5. Where indicated, inflammasome inhibitors Vx765  
232 (25  $\mu$ M) or MCC950 (2  $\mu$ M), with the addition of PI (1  $\mu$ g/mL), were added to the cells  
233 30 minutes prior to bacterial infection. DMSO was used as the solvent control. **(a-b)**  
234 PI kinetic uptake was assessed using real-time microscopy (IncucyteZOOM) (a) and  
235 then graphed as the AUC of the percentage of PI-positive cells normalized to the  
236 number of cells in the wells (b). **(c)** Cell supernatants from experiments described in  
237 (a) were collected 3 hours post infection. IL-1 $\beta$  and TNF $\alpha$  secretion were measured  
238 using commercial ELISA kits. **(d-e)** Caspase-1, GSDMD, and IL-1 $\beta$  were detected in  
239 BMDM lysate (d) and supernatant (e) by immunoblotting (the number on the right of  
240 each blot denotes the blot number). The data in (a) represent  $n \geq 3$  independent  
241 experiments. Statistical comparisons in (b-c) between the different treatments were  
242 performed using RM two-way ANOVA, followed by Turkey's multiple comparison  
243 test. The results are shown as the mean  $\pm$  SD of  $n \geq 3$  independent experiments;  
244 significant differences ( $P < 0.05$ ) are denoted only for comparisons between  
245 inflammasome inhibitors of cells infected with the same bacterial strain. The results  
246 shown in (d-e) represent 2 independent experiments. Arrows denote the expected  
247 band size.

248

#### 249 ***T6SS3 activates the NLRP3 inflammasome in BMDMs***

250 Different members of the NLR family, including NLRP1 and NLRP3, can induce  
251 inflammasome assembly and activation, leading to pyroptotic cell death (Bauernfried  
252 et al., 2021; Lamkanfi and Dixit, 2014). NLRP3 is the most studied inflammasome-  
253 activating NLR; it is activated during bacterial, viral, and fungal infections, as well as  
254 in sterile inflammation mediated by endogenous DAMPs (Swanson et al., 2019). To  
255 identify the specific inflammasome pathway that is activated by T6SS3 in BMDMs,  
256 we generated BMDMs from knock-out (KO) mice in different inflammasome  
257 pathways (i.e., *Nlrp1*<sup>-/-</sup> and *Nlrp3*<sup>-/-</sup>) and infected them with *V. proteolyticus* strains.  
258 Using real-time microscopy, we found that the death of BMDMs derived from NLRP1  
259 KO mice was comparable to that of BMDMs generated from WT mice. However,  
260 infection of NLRP3 KO BMDMs resulted in delayed cell death and ~60% reduction in

261 the calculated AUC (**Figure 3a & Figure SF1a**). Furthermore, hallmark processes of  
262 inflammasome-mediated cell death, such as IL-1 $\beta$ , Caspase-1, and GSDMD  
263 cleavage and release, which were induced in a T6SS3-dependent manner, were  
264 abrogated only in *Nlrp3*<sup>-/-</sup> BMDMs (**Figure 3b-d**). TNF $\alpha$  secretion, which was used as  
265 a control, was not affected in either of the KO mouse BMDMs (**Figure 3b**), thus  
266 confirming that priming (i.e., the NF- $\kappa$ B-dependent pathway) remained unaffected in  
267 the *Nlrp3*<sup>-/-</sup> BMDMs.

268 NLRP3 can also be activated by the necroptotic cell death pathway, which is  
269 induced by pseudo-kinase MLKL (Conos et al., 2017; Lawlor et al., 2015). To confirm  
270 that T6SS3 directly activated the NLRP3-induced cell death rather than it being an  
271 indirect consequence of a secondary mechanism of necroptotic cell death, we also  
272 monitored cell death in *Mlkl*<sup>-/-</sup> BMDMs. As expected, MLKL deficiency did not affect  
273 the induction of the T6SS3-mediated cell death (**Figure 3a & Figure SF1a**) or IL-1 $\beta$ ,  
274 Caspase-1, and GSDMD cleavage and release (**Figure 3b-d**) in BMDMs. Thus, we  
275 concluded that T6SS3 activates a pyroptotic cell death program that is mediated  
276 directly by the NLRP3 inflammasome.

277 To confirm that the observed NLRP3-dependent phenotypes are indeed  
278 mediated by bacterial T6SS3 activity, we complemented the deletion in *tssL3*, which  
279 was used to generate T6SS3<sup>-</sup> bacterial strains, from an arabinose-inducible plasmid  
280 (pTssL3). The complementation of *tssL3* in trans restored the secretion of Hcp3  
281 (**Figure SF1b**), as well as all of the tested inflammasome-mediated phenotypes,  
282 including cell death and IL-1 $\beta$ , Caspase-1, and GSDMD cleavage and release  
283 (**Figure 3e,f & Figure SF1c,d**). Importantly, TNF $\alpha$  secretion was not affected upon  
284 BMDMs infection with the TssL3-complemented *V. proteolyticus* strain (**Figure**  
285 **SF1e**). Notably, over-expression of TssL3 had no effect on bacterial growth in MLB

286 media (**Figure SF1f**), but had a minor positive effect on bacterial growth in DMEM

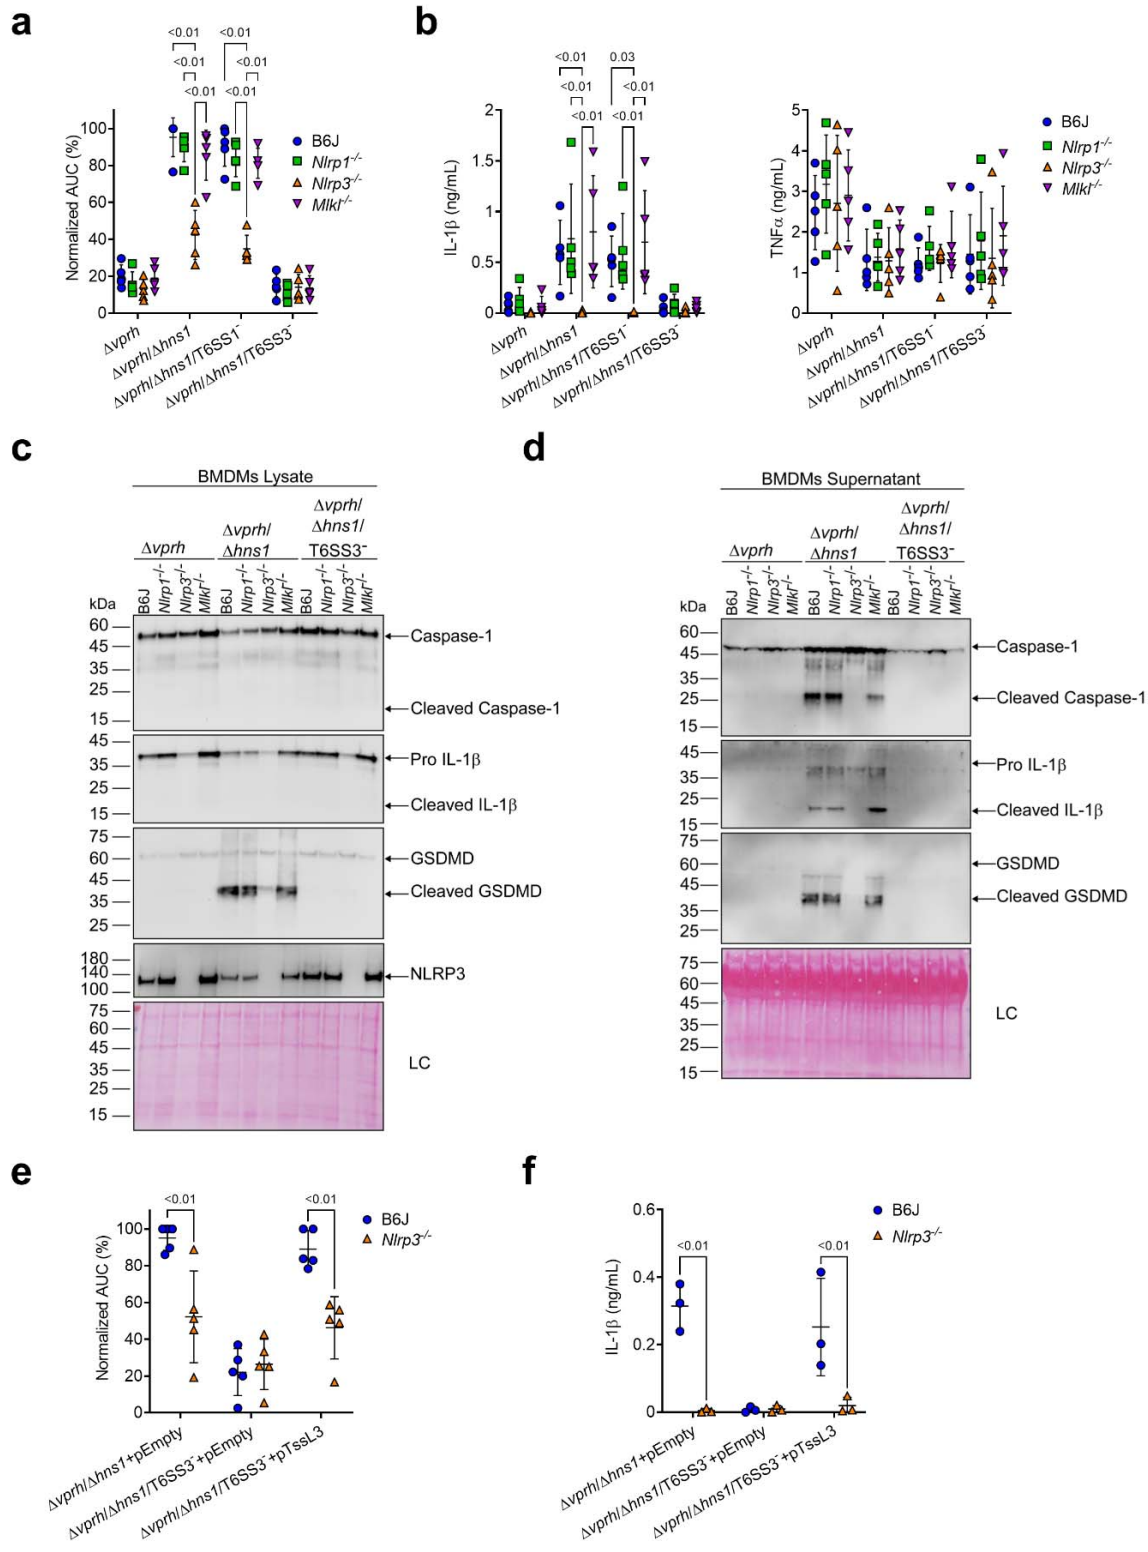

287 media (**Figure SF1f**).

### 288 **Figure 3: T6SS3 activates the NLRP3 inflammasome in BMDMs**

289 Approximately  $3.5 \times 10^4$  wild-type (B6J), *Nlrp1*<sup>-/-</sup>, *Nlrp3*<sup>-/-</sup> and *Mlkl*<sup>-/-</sup> BMDMs were  
290 seeded into 96-well plates in 6 replicates and were primed using LPS (100 ng/mL)  
291 for 3 hours prior to infection with *V. proteolyticus* strains at MOI 5. In (e-f), 0.05%  
292 arabinose was added to the media prior bacterial infection. **(a, e)** PI uptake was  
293 assessed using real-time microscopy (IncucyteZOOM) and then graphed as the AUC  
294 of the percentage of PI-positive cells normalized to the number of cells in the wells.  
295 **(b, f)** Cell supernatants from experiments described in (a) or (e), respectively, were  
296 collected 3 hours post infection. IL-1 $\beta$  and TNF $\alpha$  secretion were measured using  
297 commercial ELISA kits. **(c-d)** NLRP3, Caspase-1, GSDMD, and IL-1 $\beta$  were detected  
298 in BMDM lysate (c) and supernatant (d) by immunoblotting (the number on the right  
299 side of each blot denotes the blot number). Arrows denote the expected band size.  
300 Statistical comparisons in (a-b) and (e-f) between the different treatments were  
301 performed using RM two-way ANOVA, followed by Turkey's multiple comparison  
302 test. The results are shown as the mean  $\pm$  SD of 5 independent experiments;  
303 significant differences ( $P < 0.05$ ) are denoted only for comparisons between mice  
304 strains infected with the same bacterial strain. The results in (c-d) represent 2  
305 independent experiments.

306

### 307 ***GSDME partially compensates for GSDMD absence in T6SS3-induced*** 308 ***pyroptosis and IL-1 $\beta$ secretion***

309 A recent report suggested that in the absence of GSDMD, a cascade comprising  
310 Caspase-1, Caspase-8, Caspase-3 and GSDME can lead to cell death in BMDMs  
311 (Tsuchiya et al., 2019). To investigate whether T6SS3 can induce this cascade, we  
312 monitored *Gsdmd*<sup>-/-</sup> BMDMs upon infection with *V. proteolyticus* strains. Using real-  
313 time microscopy, we found that in contrast with the negligible cell death observed  
314 upon infection of *Nlrp3*<sup>-/-</sup> BMDMs (**Figure 4a,b**), *V. proteolyticus* strains containing an  
315 active T6SS3 (i.e.,  $\Delta$ *vprh*/ $\Delta$ *hns1* and  $\Delta$ *vprh*/ $\Delta$ *hns1*/T6SS1<sup>+</sup>) induced a significant cell  
316 death in the absence of GSDMD, albeit delayed, compared to that observed in



317 BMDMs from WT mice. Remarkably, IL-1 $\beta$  secretion from *Gsdmd*<sup>-/-</sup> BMDMs infected  
318 with the  $\Delta$ *vprih*/ $\Delta$ *hns1* or the  $\Delta$ *vprih*/ $\Delta$ *hns1*/T6SS1<sup>-</sup> strain was comparable to that  
319 detected in BMDMs generated from WT mice (**Figure 4c**). As before, TNF $\alpha$   
320 secretion was not affected in either of the KO mouse-derived BMDMs (**Figure 4c**).  
321 Moreover, while we detected the hallmark pyroptotic phenotypes in infected BMDMs  
322 generated from WT mice (i.e., cleaved and released Caspase-1, IL-1 $\beta$ , and  
323 GSDMD), in *Gsdmd*<sup>-/-</sup> BMDMs we observed the cleavage of Caspase-3 (but not  
324 Caspase-8) and GSDME, in addition to cleavage and release of IL-1 $\beta$  (**Figure 4d,e**).  
325 These results suggest that in the absence of GSDMD, T6SS3 can induce a cell  
326 death cascade comprising Caspase-1, Caspase-3, and GSDME. Therefore, GSDME  
327 can compensate, at least partially, for the absence of GSDMD. Notably, activation of  
328 this alternative cascade still requires the NLRP3 inflammasome, since cleaved  
329 Caspase-3 and GSDME were absent in *Nlrp3*<sup>-/-</sup>-derived BMDMs infected with the  
330  $\Delta$ *vprih*/ $\Delta$ *hns1* or  $\Delta$ *vprih*/ $\Delta$ *hns1*/T6SS1<sup>-</sup> strains (**Figure 4d,e**).

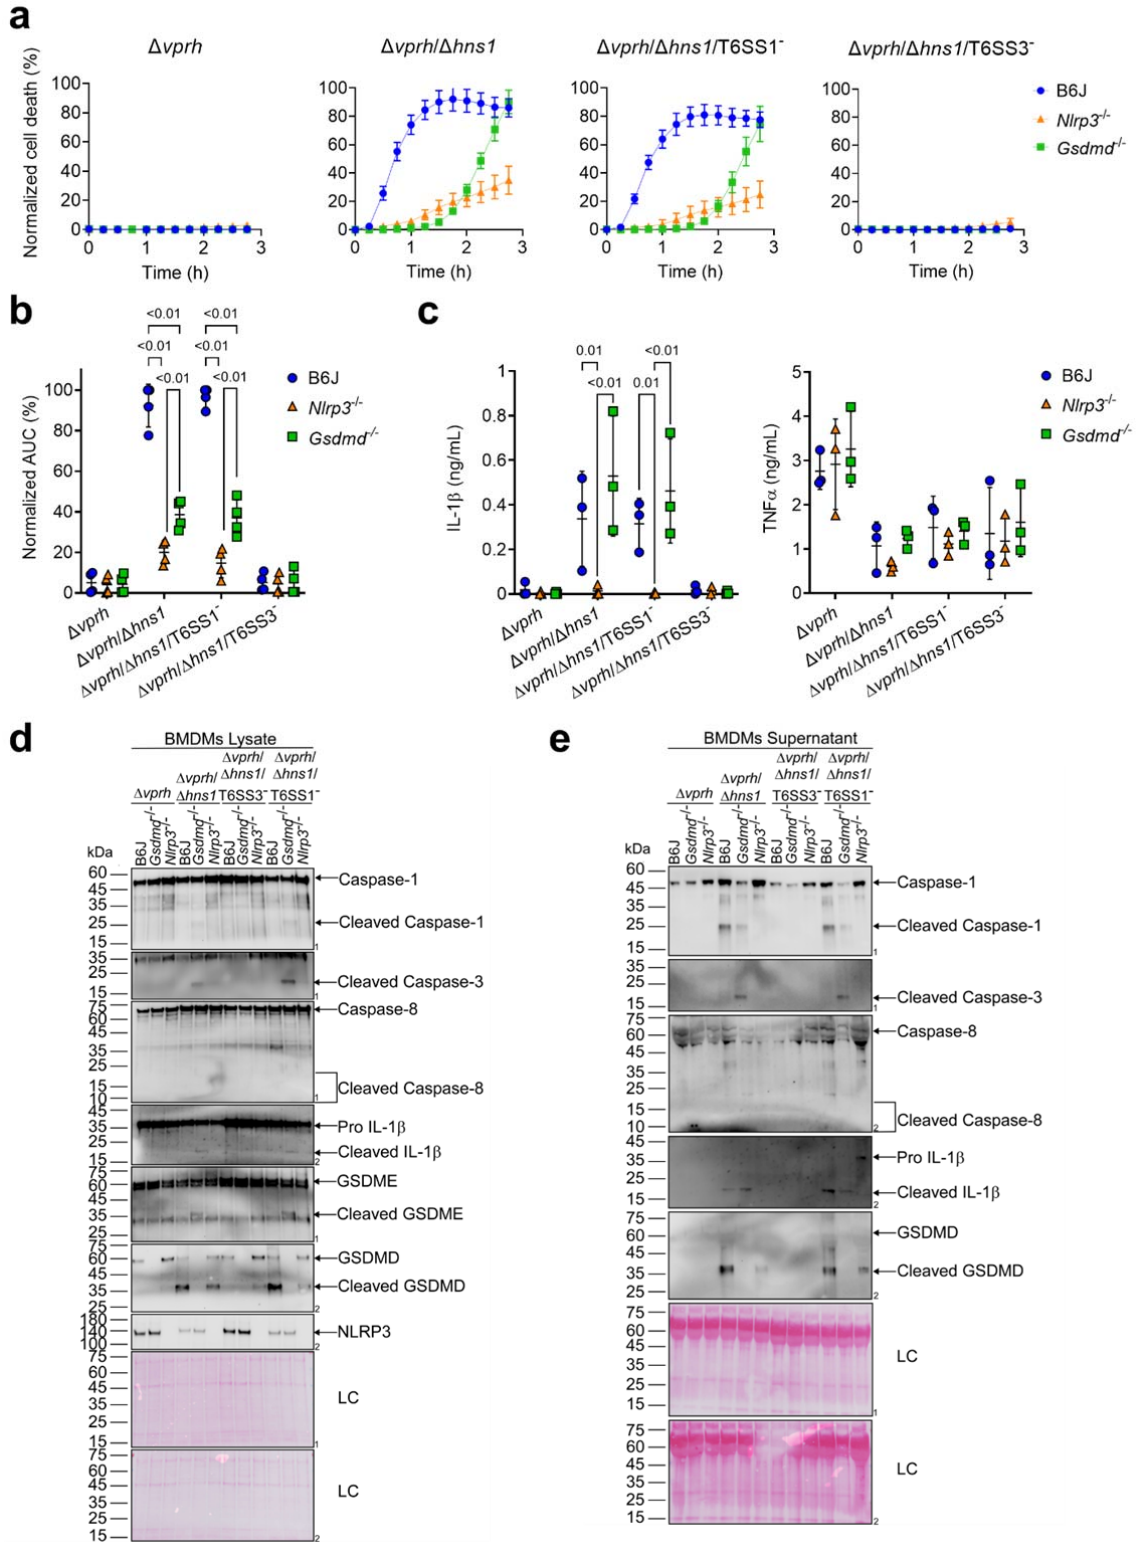

331

332 **Figure 4: GSDME partially compensates for GSDMD absence in T6SS3-induced**

333 **pyroptosis and IL-1 $\beta$  secretion**

334 Approximately  $3.5 \times 10^4$  wild-type (B6J), *Nlrp3*<sup>-/-</sup> and *Gsdmd*<sup>-/-</sup> BMDMs were seeded  
335 into 96-well plates in 6 replicates and were primed using LPS (100 ng/mL) for 3  
336 hours prior to infection with *V. proteolyticus* strains at MOI 5. **(a-b)** PI uptake was  
337 assessed using real-time microscopy (IncucyteZOOM) (a) and then graphed as the  
338 AUC of the percentage of PI-positive cells normalized to the number of cells in the  
339 wells (b). **(c)** Cell supernatants described in (a) were collected 3 hours post infection.  
340 IL-1 $\beta$  and TNF $\alpha$  secretion were measured using commercial ELISA kits. **(d-e)**  
341 NLRP3, Caspase-1, Caspase-3, Caspase-8, GSDMD, GSDME, and IL-1 $\beta$  were  
342 detected in BMDM lysate (d) and supernatant (e) by immunoblotting (the number on  
343 the right side of each blot denotes the blot number). Arrows denote the expected  
344 band size; ] denote the expected band sizes for cleaved Caspase-8. The data in (a)  
345 represent  $n \geq 3$  independent experiments. Statistical comparisons in (b-c) between the  
346 different treatments were performed using RM two-way ANOVA, followed by  
347 Turkey's multiple comparison test. The results in (b,c) are shown as the mean  $\pm$  SD  
348 of  $n \geq 3$  independent experiments; significant differences ( $P < 0.05$ ) are denoted only  
349 for comparisons between mice strains infected with the same bacterial strain. The  
350 results shown in (d-e) represent 2 independent experiments.

351

### 352 **Activation of T6SS3 by *Ats3* is sufficient to induce the NLRP3 inflammasome**

353 The above-mentioned T6SS3-dependent activation of the NLRP3 inflammasome  
354 was observed upon infection of BMDMs with bacterial strains harboring a deletion in  
355 *hns1*. Since H-NS is a global repressor (Dorman, 2004), and thus the deletion of  
356 *hns1* may have affected additional cellular systems other than T6SS1 and T6SS3,  
357 we set out to identify a positive regulator of T6SS3 that can be used to induce  
358 T6SS3, without affecting the activity of T6SS1.

359 *VPR01S\_RS02370* is found at the edge of the T6SS3 gene cluster (**Figure 5a**),  
360 and it is transcribed in the opposite direction from its neighboring T6SS3 cluster  
361 gene, *VPR01S\_RS02375*. *VPR01S\_RS02370* encodes a predicted transcription  
362 regulator belonging to the GlxA superfamily (according to the NCBI Conserved  
363 Domain Database (Lu et al., 2020)). The proximity of *VPR01S\_RS02370* to the

364 T6SS3 cluster, and the absence of a recognizable transcription regulator within the  
365 cluster led us to hypothesize that this gene, henceforth referred to as *ats3* (activator  
366 of type six secretion system 3), regulates T6SS3. To test this hypothesis, we  
367 introduced *ats3* on an arabinose-inducible expression plasmid into the  $\Delta vprh$  and  
368  $\Delta vprh/T6SS3^-$  strains, and determined its effect on T6SS1 and T6SS3 activity.  
369 Importantly, we found that T6SS3 was dramatically induced upon *Ats3* over-  
370 expression, as evident by elevated expression and secretion of Hcp3, whereas  
371 T6SS1 activity (determined by monitoring VgrG1 expression and secretion)  
372 remained unaltered (**Figure 5b**). Remarkably, over-expression of *Ats3* had a  
373 stronger effect on T6SS3 activity than deletion of *hns1* (**Figure 5b**). These results  
374 suggest that *Ats3* activates T6SS3 and not T6SS1.

375 Previous work showed that T6SS1 alone was responsible for *V. proteolyticus*'s  
376 antibacterial activity during interbacterial competition (Ray et al., 2017). To further  
377 confirm that *Ats3* affects T6SS3 and not T6SS1, we determined whether *Ats3* over-  
378 expression results in enhanced T6SS1-mediated antibacterial activity. Interbacterial  
379 competition assays against sensitive *E. coli* prey (Ray et al., 2017) revealed that in  
380 contrast to the enhanced antibacterial activity seen upon deletion of *hns1*, which  
381 induces both T6SS1 and T6SS3, over-expression of *Ats3* had no effect on the  
382 antibacterial activity (**Figure 5c**). Furthermore, over-expression of *Ats3* did not confer  
383 antibacterial activity to a strain in which T6SS1 was inactivated ( $\Delta vprh/T6SS1^-$ ).  
384 Taken together, these results indicate that *Ats3* is a positive regulator of T6SS3, and  
385 that T6SS3 does not play a role in interbacterial competition.

386 We reasoned that *Ats3* can be used to uncouple the effect of T6SS3 on  
387 pyroptosis induction from T6SS1 activity. Therefore, to confirm the specific role of  
388 T6SS3 in pyroptosis induction, we set out to investigate the effect of *Ats3* over-

389 expression on inflammasome activation and cell death. Using real-time microscopy,  
390 we found that over-expression of Ats3 from a plasmid (pAts3) induced a rapid,  
391 T6SS3-dependent cell death in BMDMs, which was similar to that induced upon  
392 *hns1* deletion (**Figure 5d,e & Figure SF2a**). Moreover, infection of *Nlrp3*<sup>-/-</sup> BMDMs  
393 with  $\Delta$ *vprh* bacteria carrying pAts3 resulted in reduced cell death compared to that  
394 observed upon infection of BMDMs generated from WT mice. In agreement, IL-1 $\beta$ ,  
395 Caspase-1, and GSDMD cleavage and release were also induced, in a T6SS3-  
396 dependent manner, upon Ats3 over-expression (**Figure 5f,g & Figure SF2b**); in  
397 contrast, TNF $\alpha$  secretion was not affected by either of *V. proteolyticus* strains in both  
398 WT and *Nlrp3*<sup>-/-</sup> BMDMs (**Figure 5f**). Notably, Ats3 over-expressing bacteria induced  
399 a slow, NLRP3-independent cell death deficient in IL-1 $\beta$ , Caspase-1, and GSDMD  
400 cleavage; this result suggests that another cell death mechanism could have been  
401 induced upon T6SS3 activation in the absence of NLRP3 (**Figure 5e-g & Figure**  
402 **SF2b**). The apparent cell death in BMDMs is probably not a result of a fitness  
403 difference between *V. proteolyticus* strains, since we did not detect any difference in  
404 either bacterial growth or motility (**Figure SF2c,d**). Combined, these results confirm  
405 that T6SS3 is specifically responsible for the inflammasome-mediated cell death  
406 induction in BMDMs.

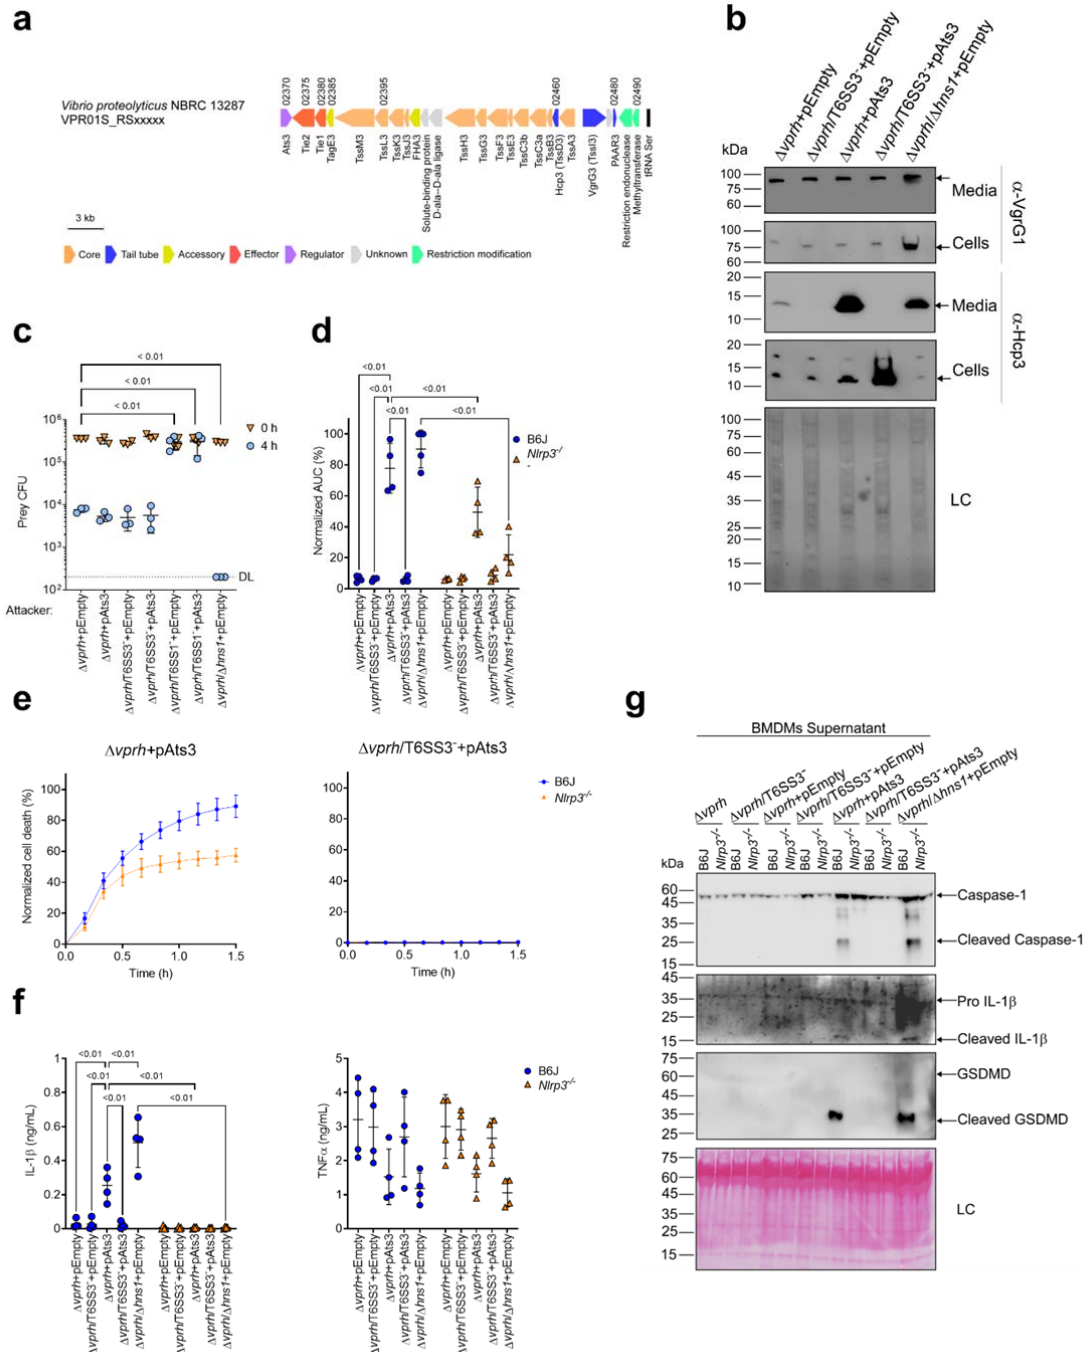

407

408 **Figure 5: Activation of T6SS3 by Ats3 is sufficient to induce the NLRP3**  
 409 **inflammasome**

410 **(a)** The T6SS3 gene cluster. Genes are represented by arrows indicating direction of  
 411 transcription. Locus tags (*vpr01s\_RSxxxx*) are denoted above; encoded proteins  
 412 and known domains are denoted below. **(b)** The expression (cells) and secretion  
 413 (media) of Hcp3 and VgrG1 were detected by immunoblotting using specific

414 antibodies against Hcp3 and VgrG1, respectively. Loading control (LC) is shown for  
415 total protein lysate. (c) Viability counts of *E. coli* XL-1 Blue prey before (0 h) and after  
416 (4 h) co-incubation with the indicated attackers, on media containing 3% (w/v) NaCl  
417 and 0.1% (w/v) arabinose at 30°C. (d-g) Approximately  $3.5 \times 10^4$  wild-type (B6J) and  
418 *Nlrp3*<sup>-/-</sup> BMDMs were seeded into 96-well plates in 6 replicates and were primed  
419 using LPS (100 ng/mL) for 3 hours prior to infection with *V. proteolyticus* strains at  
420 MOI 5. Arabinose (0.05% w/v) was added to the media prior bacterial infection. (d-e)  
421 PI uptake was assessed using real-time microscopy (IncucyteZOOM) and then was  
422 graphed as the AUC of the percentage of PI-positive cells normalized to the number  
423 of cells in the wells. (f) Cell supernatants from experiments described in (a) were  
424 collected 3 hours post infection. IL-1 $\beta$  and TNF $\alpha$  secretion were measured using  
425 commercial ELISA kits. (g) NLRP3, Caspase-1, GSDMD, and IL-1 $\beta$  were detected in  
426 BMDM supernatants by immunoblotting. Arrows denote the expected band size. The  
427 data in (b-c, e) and (g) represent the results of  $n \geq 3$  and  $n = 2$  independent experiment,  
428 respectively. The data in (c) are shown as the mean  $\pm$  SD. Statistical comparisons in  
429 (c) between samples at the 4 h timepoint were performed using an unpaired, two-  
430 tailed Student's *t*-test; significant differences ( $P < 0.05$ ) are denoted above. DL, assay  
431 detection limit. Statistical comparisons in (d) and (f) between the different treatments  
432 were performed using RM two-way ANOVA, followed by Turkey's multiple  
433 comparison test. The results are shown as the mean  $\pm$  SD of  $n \geq 4$  independent  
434 experiments; significant differences ( $P < 0.05$ ) are denoted for comparisons between  
435 infections of cells from the same mouse strain, and between infections using the  
436 same *V. proteolyticus* strain.

437

### 438 **T6SS3-induced pyroptosis requires bacterial internalization**

439 Previous reports suggested that for some T6SSs, delivery of anti-eukaryotic effectors  
440 requires internalization by a host cell (Ma et al., 2009; Shalom et al., 2007). This  
441 phenomenon was also observed for the *V. proteolyticus* T6SS1-mediated  
442 manipulation of the actin cytoskeleton (Ray et al., 2017). Therefore, we asked  
443 whether the T6SS3-mediated phenotypes observed upon infection of BMDMs are  
444 dependent on phagocytosis. Indeed, we found that the addition of cytochalasin D,

445 which inhibits phagocytosis by inhibiting actin polymerization (Brown and Spudich,  
446 1979; Flanagan and Lin, 1980), abolished the pyroptosis induced by the T6SS3 of a  
447  $\Delta vprh$  *V. proteolyticus* strain over-expressing Ats3 (**Figure 6a** & **Figure SF3a**).  
448 Interestingly, cytochalasin D also abolished the weaker inflammasome-independent,  
449 T6SS3-dependent cell death observed upon infection of *Nlrp3*<sup>-/-</sup> BMDMs. Notably,  
450 cytochalasin D did not abolish the cell death induced by T3SS1 of another pathogen,  
451 *V. parahaemolyticus*, which is independent of bacterial internalization (Burdette et  
452 al., 2008) and was therefore used as a control (**Figure SF3b**); it also did not impair  
453 bacterial growth (**Figure SF3c**). Combined, these results suggest that the T6SS3-  
454 mediated pyroptotic cell death requires phagocytosis.

455 Phagocytic cells, such as BMDMs, internalize bacteria to eliminate them. We  
456 reasoned that *V. proteolyticus* activate the T6SS3 upon phagocytosis because this  
457 system provides a survival advantage. Indeed, when we measured the bacterial load  
458 after 3 hours of BMDM infection, we observed a dramatic advantage for *V.*  
459 *proteolyticus* with an active T6SS3 ( $\Delta vprh$ +pAts3; parental strain) over a derivative  
460 strain with an inactive T6SS3 (T6SS3<sup>-</sup>) (**Figure 6b**). Notably, bacterial counts were  
461 comparable between the two strains in the absence of BMDMs (**Figure 6b**).  
462 Remarkably, the presence of BMDMs appeared to provide a growth advantage to  
463 bacteria with an active T6SS3 or to bacteria that were not phagocytosed by BMDMs  
464 (i.e., in the presence of cytochalasin D), whereas bacteria with an inactive T6SS3  
465 that were phagocytosed (i.e., in the absence of cytochalasin D) grew less than their  
466 counterparts in the absence of BMDMs (**Figure 6b**). Taken together, these results  
467 demonstrate that T6SS3 provides a survival advantage to *V. proteolyticus* upon its  
468 internalization by an immune cell.

469



470

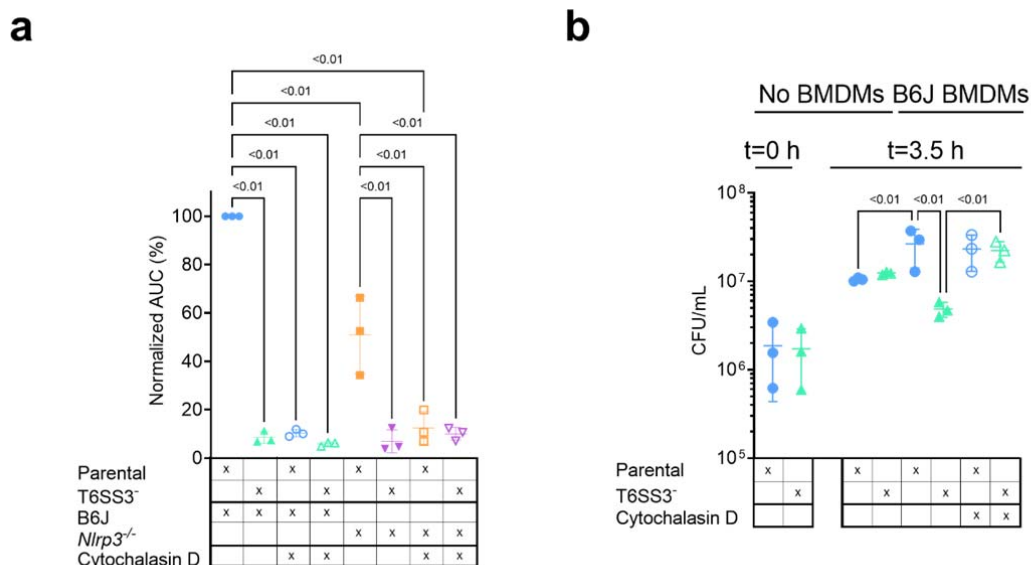

471

472 **Figure 6: *V. proteolyticus* T6SS3-induced pyroptosis requires phagocytosis**

473 Approximately  $3.5 \times 10^4$  wild-type (B6J) and *Nlrp3*<sup>-/-</sup> BMDMs were seeded into 96-well  
 474 plates in  $n \geq 3$  replicates and were primed using LPS (100 ng/mL) for 3 hours prior to  
 475 infection with *V. proteolyticus* strains at MOI 5. Arabinose (0.05% w/v) was added to  
 476 the media prior to bacterial addition. When indicated, cytochalasin D (5  $\mu$ M) was  
 477 added to the cells 45 minutes prior to bacterial infection. **(a)** PI uptake was assessed  
 478 using real-time microscopy (IncucyteZOOM) and then graphed as the AUC of the  
 479 percentage of PI-positive cells normalized to the number of cells in the wells. **(b)**  
 480 bacterial counts of *V. proteolyticus* strains before (t=0 h) and after (t=3.5 h) BMDMs  
 481 infection C. The results in (a,b) are shown as the mean  $\pm$  SD of  $n=3$  independent  
 482 experiments. Statistical comparisons in (a) between the different treatments were  
 483 performed using RM one-way ANOVA, followed by Sidak multiple comparison test.  
 484 Statistical comparison in (b) between the different treatments were performed using  
 485 RM one-way ANOVA. Significant differences ( $P < 0.05$ ) are denoted. Parental, *V.*  
 486 *proteolyticus*  $\Delta$ *vrph*+pAts3; T6SS3<sup>-</sup>, *V. proteolyticus*  $\Delta$ *vrph*/ $\Delta$ *tssL3*+pAts3.

487

488 **Two T6SS3 effectors are necessary and sufficient to induce pyroptotic cell**  
 489 **death**

490 While analyzing the T6SS3 gene cluster, we were intrigued by two genes found  
491 adjacent to *ats3*, namely, *VPR01S\_RS02380* and *VPR01S\_RS02375* (Figure 5a).  
492 The two genes, hereafter termed *tie1* (T6SS3 inflammasome-inducing effector 1)  
493 and *tie2*, respectively, encode proteins with no apparent similarity to known T6SS  
494 core or accessory components (Boyer et al., 2009). Interestingly, hidden Markov  
495 model analyses (using the Jackhmmer server (Potter et al., 2018)) revealed that Tie2  
496 shares partial similarity (in the region between amino acids 326 and 469) with  
497 domains found at C-termini of polymorphic toxins, such as proteins containing N-  
498 terminal LXG and WXG100 domains that are associated with type VII secretion  
499 systems (Tran et al., 2021; Whitney et al., 2017), as well as DUF4157 domains,  
500 which were recently suggested to carry toxins in extracellular contractile injection  
501 systems (Geller et al., 2021). These observations led us to hypothesize that Tie1 and  
502 Tie2 are T6SS3 effectors. To test this hypothesis, we generated custom-made  
503 antibodies against Tie1 and Tie2, and monitored their expression and secretion upon  
504 over-expression of *Ats3*, which activates T6SS3. As shown in Figure 7a, Tie1 and  
505 Tie2 were secreted in a T6SS3-dependent manner, as was Hcp3; in contrast,  
506 secretion of VgrG1, a T6SS1 component, was unaffected by *Ats3* over-expression.  
507 These results confirm that both Tie1 and Tie2 are T6SS3 secreted proteins.

508 The above findings prompted us to posit that if Tie1 and Tie2 are indeed T6SS3  
509 effectors, then they can be responsible for the T6SS3-mediated induction of  
510 pyroptosis in BMDMs. To test this hypothesis, we generated *V. proteolyticus* mutant  
511 strains with deletions in either *tie1* (deletion of the region corresponding to  
512 nucleotides 485-584 in *tie1*), *tie2*, or both; we used them to infect BMDMs, and then  
513 we monitored the effect on cell death. Remarkably, deletion of both *tie1* and *tie2* in a  
514  $\Delta vprh/\Delta hns1$  background ( $\Delta vprh/\Delta hns1/\Delta tie1/\Delta tie2$ ) completely abolished the cell

515 death and IL-1 $\beta$  secretion observed upon infection of BMDMs with the  $\Delta vprh/\Delta hns1$   
516 strain (**Figure SF3a,b**), without affecting TNF $\alpha$  secretion (**Figure SF3b**). Deletion of  
517 *tie1* alone resulted in an intermediate cell death phenotype, whereas deletion of *tie2*  
518 alone had no significant effect. Complementation of Tie1 and Tie2 expression from a  
519 plasmid in the  $\Delta vprh/\Delta hns1/\Delta tie1/\Delta tie2$  strain revealed that over-expression of Tie1,  
520 either alone (pTie1) or together with Tie2 (pTie1-2), completely restored the cell  
521 death phenotype, whereas bacteria over-expressing only Tie2 (pTie2) regained an  
522 intermediate ability to induce cell death (**Figure 7b,c**). Similar effects of *tie1* and *tie2*  
523 deletions were observed in the tested inflammasome-activation hallmark  
524 phenotypes, including IL-1 $\beta$ , Caspase-1, and GSDMD cleavage and release (**Figure**  
525 **7d-f & Figure SF3b-d**). TNF $\alpha$  secretion was not significantly affected by  
526 complementation of Tie1 or Tie2 when BMDMs were infected with the indicated *V.*  
527 *proteolyticus* strains (**Figure 7d**). Importantly, deletion of *tie1*, *tie2*, or both did not  
528 affect T6SS3 functionality, as evident by the secretion of Hcp3 (**Figure SF3e**); it also  
529 did not affect bacterial growth or swimming motility (**Figure SF3f-g**). Taken together,  
530 these results indicate that Tie1 and Tie2 are T6SS3 effectors that are necessary to  
531 induce inflammasome-mediated cell death in BMDMs. Either protein is also sufficient  
532 to induce cell death, although the effect of Tie1 is more pronounced than that of  
533 Tie2.



541  $3.5 \times 10^4$  wild-type BMDMs were seeded into 96-well plates in 6 replicates and were  
542 primed using LPS (100 ng/mL) for 3 hours prior to infection with *V. proteolyticus*  
543 strains at MOI 5. Arabinose (0.05% w/v) and 250  $\mu$ g/mL kanamycin were added to  
544 the media prior to bacterial infection. **(b-c)** PI uptake was assessed using real-time  
545 microscopy (IncucyteZOOM) (b) and then graphed as the AUC of the percentage of  
546 PI-positive cells normalized to the number of cells in the wells (c). **(d)** Cell  
547 supernatants from experiments described in (b) were collected 3 hours post  
548 infection. IL-1 $\beta$  and TNF $\alpha$  secretion were measured using commercial ELISA kits. **(e-**  
549 **f)** NLRP3, Caspase-1, GSDMD, and IL-1 $\beta$  were detected in BMDM lysates (e) and  
550 supernatants (f) by immunoblotting. The data in (a-b) and (e-f) represent 3 and 2  
551 independent experiments, respectively. Statistical comparisons in (c-d) between the  
552 different treatments were performed using RM one-way ANOVA, followed by  
553 Dunnett's multiple comparison test. The results are shown as the mean  $\pm$  SD of 3  
554 independent experiments; significant differences ( $P < 0.05$ ) are denoted only for  
555 comparisons of treatments to the  $\Delta vprh/\Delta hns1 + pEmpty$  treatment. In (a, e, f), arrows  
556 denote the expected band size.

557

### 558 ***T6SS3-like systems are found in pathogenic marine bacteria***

559 Since vibrios are known for their ability to share traits and virulence factors via  
560 horizontal gene transfer (HGT) (Roux et al., 2015), we asked whether T6SS3-like  
561 clusters are found in other bacteria. Indeed, we identified highly similar T6SS  
562 clusters in other marine bacteria, including human pathogens such as *V.*  
563 *parahaemolyticus* and *V. vulnificus* (Baker-Austin et al., 2018), and marine animal  
564 pathogens such as *Vibrio crassostreae* (Bruto et al., 2017) and *Vibrio anguillarum*  
565 (Frans et al., 2011) (**Figure 8**). Interestingly, these T6SS3-like clusters are often  
566 adjacent to mobile genetic elements such as integrases or transposases, suggesting  
567 a mechanism for their spread via HGT. Notably, the identified T6SS3-like clusters  
568 carry a homolog of at least one of the inflammasome-inducing effectors, Tie1 or

569 Tie2, at the edge of the cluster. Thus, these systems probably maintain their  
 570 inflammasome-inducing activity, which may contribute to their pathogenic potential.

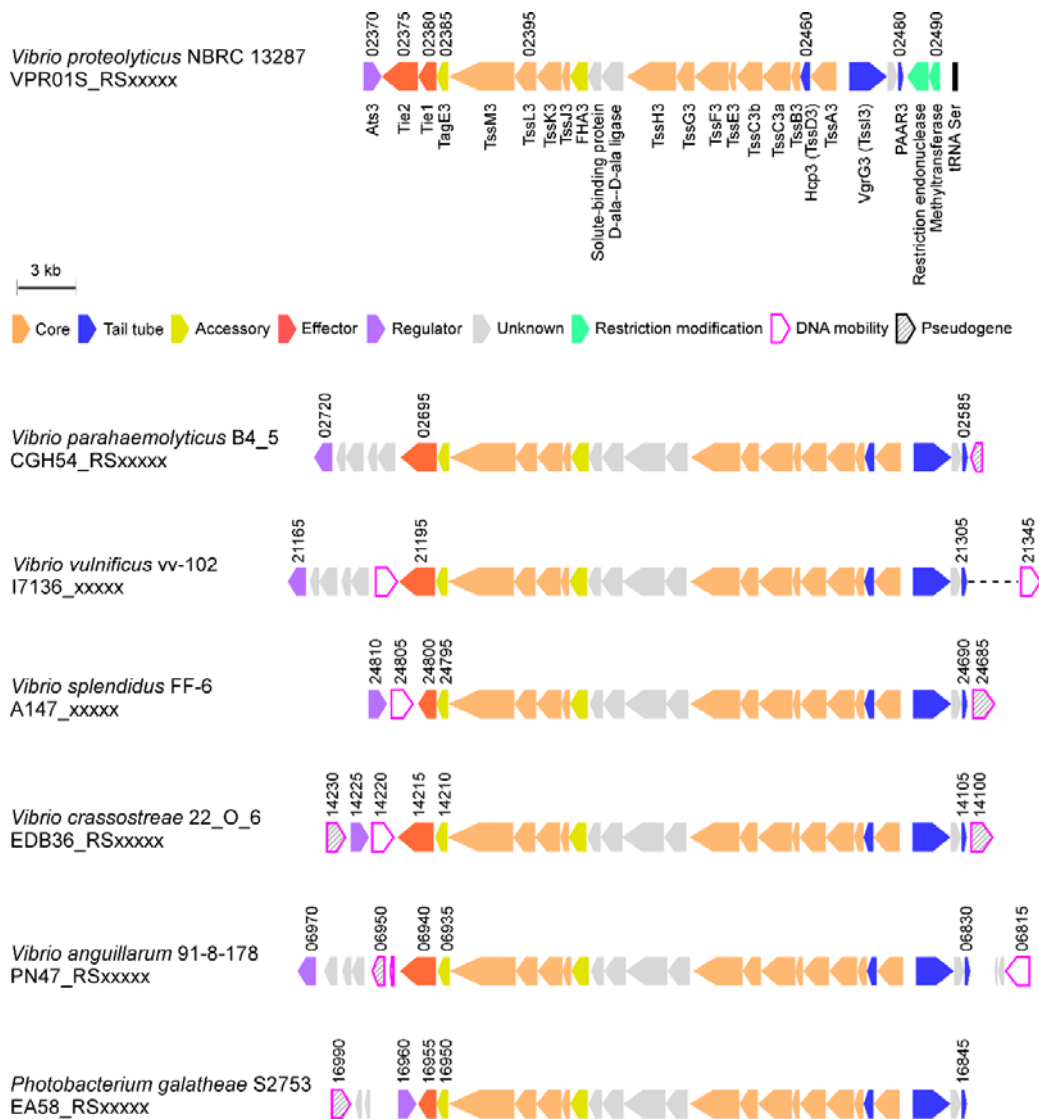

571

572 **Figure 8: T6SS3-like systems are found in pathogenic marine bacteria**

573 T6SS3-like gene clusters. Genes are represented by arrows indicating the direction  
 574 of transcription. Locus tags are denoted above; encoded proteins and known  
 575 domains are denoted below for *V. proteolyticus*. A dashed line denotes a gap  
 576 containing genes that are not shown.

577

578

## 579 **Discussion**

580 T6SSs are sophisticated molecular machines that are used by Gram-negative  
581 bacteria to inject toxic effector proteins into neighboring cells. Even though most  
582 T6SSs studied to date mediate interbacterial competition by injecting antibacterial  
583 effectors into neighboring bacteria, few T6SSs were found to target eukaryotes  
584 (Bröms et al., 2010; Clemens et al., 2018; Jiang et al., 2014; Monjarás Feria and  
585 Valvano, 2020; Pukatzki et al., 2007; Rosales-Reyes et al., 2012; Sana et al., 2015;  
586 Wang et al., 2009). In this work, we describe T6SS3, a functional T6SS in the marine  
587 bacterium *V. proteolyticus*, which induces inflammasome-mediated cell death  
588 (known as pyroptosis) upon phagocytosis. We show that this T6SS-mediated  
589 pyroptotic cell death is dependent on the delivery at least two novel effectors, and  
590 that it involves the activation of the NLRP3 inflammasome, leading to the processing  
591 and release of Caspase-1, IL-1 $\beta$ , and GSDMD. Two other T6SS effectors were  
592 previously reported to indirectly affect inflammasome activation: EvpP from  
593 *Edwardsiella tarda* was shown to inhibit the NLRP3 inflammasome by targeting the  
594 MAPK-Jnk pathway (Chen et al., 2017), whereas TecA from *Burkholderia*  
595 *cenocepacia* deamidates Rho GTPases, leading to activation of the pyrin-  
596 inflammasome (Aubert et al., 2016). Here, we describe for the first time, to the best  
597 of our knowledge, not one but two T6SS effectors that lead to activation of the  
598 NLRP3 inflammasome.

599 Remarkably, we found that in the absence of GSDMD, the canonical gasdermin  
600 activated during pyroptosis, an alternative NLRP3-dependent inflammasome cell  
601 death cascade, which includes Caspase-3 (but not Caspase-8) and GSDME, can be  
602 induced by this T6SS3. Since IL-1 $\beta$  release is one of the most ancient and  
603 conserved immune mechanism (Dinarello, 2018), it is impotent to understand how

604 the mammalian immune system evolved to induce several backup mechanisms to  
605 ensure its activation. Even in the case of GSDMD inhibition, which may occur if  
606 GSDMD is targeted by the pathogen (Luchetti et al., 2021), a conserved mechanism  
607 including the activation of Caspase-3 and GSDME in a NLRP3 inflammasome-  
608 dependent manner will result in the secretion of this proinflammatory cytokine.  
609 Notably, a recent study independently reported a similar compensation mechanism  
610 in the absence of GSDMD via chemical or *Salmonella*-induced NLRP3  
611 inflammasome activation that also included Caspase-8 activation (Zhou and Abbott,  
612 2021). In contrast, we were unable to detect Caspase-8 activation in our system.  
613 Notably, a recent study independently reported a similar compensation mechanism  
614 in the absence of GSDMD via chemical or *Salmonella*-induced NLRP3  
615 inflammasome activation; the reported mechanisms also included Caspase-8  
616 activation (Zhou and Abbott, 2021). In contrast, we were unable to detect Caspase-8  
617 activation in our system. Therefore, we propose that the cascade revealed in our  
618 work involves direct Caspase-3 activation by Caspase-1, as was previously  
619 suggested for Aim2 inflammasome in the absence of Caspase-8 (Sagulenko et al.,  
620 2018).

621 In the battle between mammalian cells and pathogens, the immune response  
622 mechanism that is activated plays a central role in the host's ability to fight-off  
623 infections. Inflammasome activation (and pyroptotic cell death), which is an ancient  
624 innate immune mechanism, is activated by numerous inputs and cellular stresses  
625 (Lamkanfi and Dixit, 2014; Schroder and Tschopp, 2010). Nevertheless, the  
626 immunological consequences of inflammasome activation by pathogens remain  
627 enigmatic. Often it is a useful mechanism that enables the host to eliminate infection  
628 either by inducing inflammation or by killing infected cells; however, in certain



629 scenarios, inflammasome activation can be exploited by the pathogen, and it  
630 provides it with an advantage against the immune system (Man et al., 2017). Indeed,  
631 we observed a T6SS3-mediated growth advantage to *V. proteolyticus* during  
632 BMDMs infection when phagocytosis, which is generally used by the immune cell to  
633 eliminate the bacteria, was functional. Future investigations will determine whether  
634 T6SS3-induced pyroptosis is beneficial to the bacterium or to the host during in vivo  
635 infection.

636         Although mammals are probably not the natural target for the *V. proteolyticus*  
637 T6SS3, nor are they the evolutionary driving force for the activity of the effectors Tie1  
638 and Tie2, immune responses similar to the ones described here (e.g., cell death  
639 mechanisms) are found in marine animals that are in direct contact with pathogenic  
640 vibrios (e.g., arthropods and fish). Indeed, *Vibrio coralliilyticus* was recently  
641 described to activate Caspase-3, leading to cleavage of GSDME and cell death in  
642 corals (Jiang et al., 2020), while a Caspase-1 homolog was previously described in  
643 *Artemia sinica* (Chu et al., 2014). Since NLR proteins, such as NLRP3, are less  
644 conserved in marine animals, we hypothesize that the target of Tie1 and Tie2 is  
645 upstream of NLRP3, and therefore the conservation between mammalian cells and  
646 marine animals lies in their ability to sense the effect of Tie1 and Tie2 activity as a  
647 danger signal that activates cell death pathways. Moreover, since we find  
648 homologous T6SS clusters that carry Tie1 and Tie2 homologs in other bacteria,  
649 including human pathogens, this T6SS and these effectors may contribute to the  
650 virulence of some bacteria. Finally, the probable horizontal transfer of this anti-  
651 eukaryotic T6SS between marine bacteria may also contribute to the emergence of  
652 new pathogenic *Vibrio* strains.

653 Here, we also shed light on the regulation of T6SS3. We found that similar to  
654 T6SS in other bacteria, both T6SS1 and T6SS3 in *V. proteolyticus* are repressed by  
655 H-NS. Importantly, we demonstrated that Ats3, which appears to be conserved also  
656 in the homologous T6SS clusters found in other bacteria, is an activator of T6SS3  
657 but not of T6SS1. When over-expressed, Ats3 activated T6SS3 even more  
658 dramatically than the deletion of *hns1*. Interestingly, the Ats3-induced T6SS3  
659 activated NLRP3 independent cell death in BMDMs, which had different kinetics than  
660 the NLRP3-mediated cell death. This result suggests that upon hyper-activation,  
661 T6SS3 can induce different cell death mechanisms.

662 In conclusion, we describe T6SS3, an anti-eukaryotic T6SS in *V. proteolyticus*,  
663 and we identify two novel anti-eukaryotic effectors. We also decipher the mechanism  
664 of cell death, which is induced by the two effectors in primary macrophages.  
665 Nevertheless, future studies will address the question regarding the activity and  
666 target of the two effectors, and they will determine how these effectors activate the  
667 inflammasome. Moreover, it remains to be determined whether inflammasome-  
668 induced cell death is beneficial to the host or to the bacterium during infection.

669

## 670 **Acknowledgements**

671 This work was performed in partial fulfillment of the requirements for a Ph.D. degree  
672 for (H.C), the Sackler Faculty of Medicine, Tel Aviv University, Israel. C.M.F was  
673 supported by a scholarship from the Clore Israel Foundation, a scholarship for  
674 outstanding doctoral students from the Orthodox community (The Council for Higher  
675 Education), and by a fellowship from the Manna Center Program in Food Safety and  
676 Security at Tel Aviv University. The research of D.S. and M.G. was supported by the

677 Israel Science Foundation (ISF) (grants 920/17 and 2174/22), and the Recanati  
678 Foundation (TAU).

679

680 **Author contributions**

681 Conceptualization, D.S., and M.G.; Methodology, H.C., N.B., C.M-F., L.E-B., D.S.,  
682 and M.G.; Investigation, H.C., N.B., L.E-B., D.S., and M.G.; Writing – Original Draft,  
683 H.C.; Writing – Review & Editing, H.C., D.S., and M.G.; Funding Acquisition, D.S.,  
684 and M.G.; Validation, H.C., N.B.; Supervision, D.S., and M.G.

685

686 **Declaration of interests**

687 The authors declare no competing interests.

688 **Material and Methods**

689

690 **Reagents**

691 Unless otherwise stated, all cell culture reagents were purchased from Biological  
692 Industries, Beit-Haemek, Israel. Lipopolysaccharides (LPS) of *Escherichia coli*  
693 O111:B4 were purchased from Sigma-Aldrich (#L3024). Propidium Iodide (PI) was  
694 purchased from Sigma-Aldrich (#P4170). Vx765 and MCC950 and ELISA kits were  
695 purchased from Invitrogen. HRP-conjugated secondary antibodies were purchased  
696 from Jackson ImmunoResearch Labs (West Grove, PA, USA). Cytochalasin D (1233)  
697 was purchased from Tocris.

698 **Mice:** C57BL/6 (wild-type [WT]), NLRP3<sup>tm1Bhk/J</sup>, MLKL KO, NLRP1 KO and  
699 GSDMD KO mice were bred under specific pathogens free conditions in the animal  
700 facility at Tel Aviv University. Experiments were performed according to the  
701 guidelines of the Institute's Animal Ethics Committees.

702 **Cell culture:** Bone marrow (BM) cells from mice were isolated by flushing femurs  
703 and tibias with 5 mL PBS supplemented with 2% (v/v) heat-inactivated fetal bovine  
704 serum (FBS) Gibco (Thermo Fisher Scientific, Waltham, MA, USA). The BM cells  
705 were centrifuged for 5 minutes at 400 x g and then resuspended in Dulbecco's  
706 Modified Eagle Medium (DMEM) (Sartorius, 01-052-1A) supplemented with 10%  
707 (v/v) FBS and 15% L929 conditional medium (L-con). Bone marrow-derived  
708 macrophages (BMDMs) were obtained by 7 days differentiation as previously  
709 described (Trouplin et al., 2013).

710 **Bacterial strains and media:** For a complete list of strains used in this study, see  
711 [Supplemental Table S1](#). *Vibrio proteolyticus* and its derivatives, as well as *V.*  
712 *parahaemolyticus*, were grown in Marine Lysogeny Broth (MLB; Lysogeny broth

713 supplemented with NaCl to a final concentration of 3% [w/v]) or on MLB agar plates  
714 (supplemented with 1.5% [w/v] agar) at 30°C. Media were supplemented with  
715 kanamycin (250 µg/mL) or chloramphenicol (10 µg/mL) when appropriate to maintain  
716 plasmids. *Escherichia coli* were grown in 2xYT broth (1.6% [w/v] tryptone, 1% [w/v]  
717 yeast extract, and 0.5% [w/v] NaCl) or Lysogeny broth (LB) at 37°C. Media were  
718 supplemented with kanamycin (30 µg/mL) or chloramphenicol (10 µg/mL) when  
719 appropriate to maintain plasmids. To induce the expression of genes from pBAD  
720 plasmids, 0.1% (w/v) L-arabinose was included in the media.

721 **Plasmid construction:** For a complete list of plasmids used in this study, see  
722 [Supplemental Table S2](#). Primers used for amplification are listed in [Supplemental](#)  
723 [Table S3](#). For arabinose-inducible expression, the coding sequences (CDS) of  
724 *tssL3*, *ats3*, *tie1* and *tie2* were amplified from *V. proteolyticus* genomic DNA.  
725 Amplicons were inserted into the multiple cloning site (MCS) of pBAD/Myc-His<sup>Kan</sup>  
726 using the Gibson-assembly method (Gibson et al., 2009). The constructed plasmids  
727 were transformed into *E. coli* DH5α (λ-pir) competent cells using electroporation.  
728 Plasmids were conjugated into *V. proteolyticus* using tri-parental mating. Trans-  
729 conjugants were selected on MLB agar plates supplemented with appropriate  
730 antibiotics to maintain the plasmids.

731 **Construction of bacterial deletion strains:** For in-frame deletions of *V.*  
732 *proteolyticus* genes, 1 kb sequences upstream and downstream of each gene or  
733 region to be deleted were cloned into pDM4, a CmOriR6K suicide plasmid (O'Toole  
734 et al., 1996) using restriction digestion and ligation. These pDM4 constructs were  
735 transformed into *E. coli* DH5α (λ-pir) by electroporation, and then transferred into *V.*  
736 *proteolyticus* via conjugation. Trans-conjugants were selected on MLB agar plates  
737 containing chloramphenicol (10 µg/mL). The resulting trans-conjugants were grown

738 on MLB agar plates containing sucrose (15% [w/v]) for counter-selection and loss of  
739 the SacB-containing pDM4. Deletion was confirmed by PCR.

740 **Bacterial growth assays:** Overnight-grown cultures of *V. proteolyticus* were  
741 normalized to an OD<sub>600</sub> = 0.01 in MLB media and transferred to 96-well plates (200  
742 µL per well). For each experiment, n = 3. Cultures were grown at 30°C or 37°C in a  
743 BioTek EPOCH2 microplate reader with continuous shaking at 205 cpm. OD<sub>600</sub>  
744 readings were acquired every 10 minutes. Experiments were performed at least  
745 three times with similar results.

746 **Bacterial swimming assays:** Swimming media plates were prepared with Lysogeny  
747 broth containing 20 g/L NaCl and 3 g/L Agar. When necessary to induce the  
748 expression of genes from a plasmid, 0.1% (w/v) L-arabinose was included in the  
749 media. *V. proteolyticus* strains that were grown overnight on an MLB plate were  
750 picked and then stabbed into the swimming plates using a toothpick (n = 3). Plates  
751 were incubated at 30°C for 8–16 h. Swimming was assessed by measuring the  
752 diameter of the spreading bacterial colony. The experiments were performed three  
753 times with similar results.

754 **Infection experiments:** BMDMs were washed three times using PBS and then  
755 seeded at a final concentration of  $3.5 \times 10^4$  cells/mL in triplicate in 1% FBS and  
756 penicillin–streptomycin-free DMEM. BMDMs were pre-incubated with LPS (100  
757 ng/mL, 3 h), and then infected with *V. proteolyticus* at MOI 5. When used,  
758 inflammasome inhibitors Vx765 (25 µM) and MCC950 (2 µM) were added 30  
759 minutes prior to infection. For phagocytosis inhibition assay, cytochalasin D (final  
760 concentration 5 µM) was added 30 minutes prior to infection. More specifically,  
761 overnight cultures of *V. proteolyticus* strains were washed and normalized to  
762 OD<sub>600</sub>=0.016 (5 MOI) in DMEM without antibiotics. Bacteria were added to wells

763 containing the BMDMs, and plates were centrifuged for 5 minutes at 400 x *g*. Plates  
764 were inserted into the IncucyteZOOM (Essen BioScience) for incubation at 37°C and  
765 for monitoring cell death, as detailed below.

766 **Live cell imaging:** Plates containing BMDMs were placed in IncucyteZOOM and  
767 images were recorded every 10–30 minutes. The data were analyzed using the  
768 IncucyteZoom2016B analysis software and then exported to the GraphPad Prism  
769 software. Normalization was performed according to the maximal PI-positive object  
770 count to calculate the percentage of dead cells (Isherwood et al., 2011).

771 **Immune response immunoblot analyses:** Cells were collected and pelleted by  
772 centrifugation for five minutes at 400 x *g* (4°C). Next, the cells were lysed by adding  
773 denaturing (2X) Tris-Glycine SDS Sample Buffer supplemented with 5% (v/v) β-  
774 mercaptoethanol. Lysates were loaded onto any-kD gradient ExpressPlus™ Page  
775 precast gels (GenScript). Proteins were transferred onto a nitrocellulose membrane  
776 (Bio-Rad), and Ponceau S staining was performed routinely to evaluate the loading  
777 accuracy. Membranes were blocked with 5% (w/v) skim milk in Tris-Buffered  
778 Saline(TBS) for 1-2 h, and then probed overnight with primary antibodies (all  
779 antibodies were diluted 1:1000, unless noted otherwise): mouse-NLRP3 (AdipoGen;  
780 cryo-2), pro and mature mouse-IL-1β (R&D Systems; AF-401-NA), pro and cleaved  
781 mouse Caspase-1 (Santa Cruz; sc- 514) (Adipogen; AG-20B-0042-C100), pro and  
782 cleaved mouse-GSDMD (Abcam; ab209845), pro and cleaved mouse-GSDME  
783 (Abcam, ab215191), cleaved Caspase-3 (Cell Signaling, 9661S) and Caspase-8  
784 (R&D; AF1650). Relevant horseradish peroxidase-conjugated secondary antibodies  
785 were applied for at least 1 h. Membranes were washed four times in TBS containing  
786 0.1% (v/v) Tween 20 (TBST) between antibody incubations. Antibodies were diluted  
787 in TBST containing 5% (w/v) skim milk. Immunoblots were visualized using an ECL

788 kit (Bio-Rad) in an ODYSSEY Fc (Li-COR) equipped with Image Lab software. All  
789 images were cropped for presentation; full-size images will be presented upon  
790 request.

791 **Protein secretion assays:** *V. proteolyticus* isolates were grown overnight in MLB  
792 broth supplemented with antibiotics to maintain plasmids, if needed. Cultures were  
793 normalized to  $OD_{600} = 0.18$  in 5 mL MLB with appropriate antibiotics and 0.05% (w/v)  
794 arabinose, when required. Cultures were grown for 5 h at 30 °C. After 5 h, for  
795 expression fractions (cells), 0.5  $OD_{600}$  units were collected, and cell pellets were  
796 resuspended in (2X) Tris-Glycine SDS sample buffer (Novex, Life Sciences). For  
797 secretion fractions (media), culture volumes equivalent to 10  $OD_{600}$  units were  
798 filtered (0.22  $\mu\text{m}$ ), and proteins were precipitated using deoxycholate and  
799 trichloroacetic acid (Bensadoun and Weinstein, 1976). Cold acetone was used to  
800 wash the protein precipitates twice. Then, protein precipitates were resuspended in  
801 20  $\mu\text{L}$  of 10 mM Tris-HCl pH = 8, followed by the addition of 20  $\mu\text{L}$  of (2X) Tris-  
802 Glycine SDS Sample Buffer supplemented with 5% (v/v)  $\beta$ -mercaptoethanol. Next,  
803 0.5  $\mu\text{L}$  of 1 N NaOH was added to maintain a basic pH. Expression and secretion  
804 samples were boiled and then resolved on any-kD gradient Mini-PROTEAN or  
805 Criterion™ TGX Stain-Free™ precast gels (Bio-Rad). Expression and secretion were  
806 evaluated using western blot with specific, custom-made antibodies against VgrG1  
807 (described previously (Li et al., 2017)), and Hcp3, Tie1, or Tie2 (polyclonal antibodies  
808 raised in rabbits against peptides: CQKHNYELEGGEIKD, CVNIGKKYTDFTEDEL,  
809 and STPLGKAVDIPVEKC, respectively). Tie2, Hcp3 and VgrG1 antibodies were  
810 used at 1:1000 dilution, and Tie1 antibodies were used at 1:5000 dilution. Protein  
811 signals were visualized in a Fusion FX6 imaging system (Vilber Lourmat) using



812 enhanced chemiluminescence (ECL) reagents. Equal loading was assessed using  
813 trihalo compounds' fluorescence of the immunoblot membrane.

814 **Bacterial competition assays:** Attacker and prey strains were grown overnight in  
815 appropriate broth (MLB for *V. proteolyticus* and 2xYT for *E. coli*) with the addition of  
816 antibiotics when maintenance of plasmids was required. Competition assays were  
817 performed as previously described (Salomon et al., 2013). Briefly, bacterial cultures  
818 were normalized to  $OD_{600} = 0.5$  and were mixed at a 4:1 ratio (attacker:prey).  
819 Triplicates of mixtures were spotted (25  $\mu$ L) on MLB agar plates containing 0.1%  
820 (w/v) arabinose, and incubated for 4 h at 30°C. Prey colony forming units (CFU)  
821 were calculated after the cultures from t=0 h and t=4 h were collected and grown on  
822 selective media plates. The assay was performed three times with similar results,  
823 and the results from representative experiments are shown.

824 **Bacterial count quantification:** BMDM infection experiments were performed as  
825 described above. Bacterial counts were assessed at the time of infection (t=0 h) and  
826 3.5 h post infection (t=3.5 h). To recover bacteria, triton X-100 was added directly  
827 into the experiment wells to a final concentration of 1%, and the plate was incubated  
828 for 15 minutes at 37°C. The media were collected from the wells, and 10-fold serial  
829 dilutions were spotted onto selective media plates. CFU counts were determined  
830 after overnight incubation of the plates at 30°C. The assay was performed three  
831 times with similar results.

832 **Identification of T6SS3-homologous clusters:** T6SS3-like clusters were identified  
833 by searching for homologs of the *V. proteolyticus* TssM3 protein sequence using  
834 BLAST (Stephen F. Altschul, Warren Gish, Webb Miller, Eugene W. Myers, 1990).  
835 The genomic neighborhoods of randomly selected homologs were then manually

836 examined, and representative clusters with similar genetic composition were chosen  
837 for presentation.

838 **Statistical analysis:** Data were analyzed using GraphPad prism 9. Data are  
839 presented as the mean  $\pm$  standard deviation (SD). Comparisons were performed  
840 using RM one-way ANOVA, followed by Sidak's multiple comparison test or RM two-  
841 way ANOVA, followed by Tukey's multiple comparison test, unless otherwise is  
842 indicated. Statistical significance was considered at  $P < 0.05$ .

843

844 **Supplemental Table S1. A list of bacterial strains used in this study.**

| Strain name                                     | Genotype                                                                               | Source             |
|-------------------------------------------------|----------------------------------------------------------------------------------------|--------------------|
| <i>Vibrio proteolyticus</i><br>ATCC 15338       | Wild-type                                                                              | ATCC               |
| T6SS1 <sup>-</sup>                              | <i>Vibrio proteolyticus</i> ATCC 15338<br>$\Delta$ tssG1                               | (Ray et al., 2017) |
| T6SS3 <sup>-</sup>                              | <i>Vibrio proteolyticus</i> ATCC 15338<br>$\Delta$ tssL3                               | This study         |
| $\Delta$ vprh                                   | <i>Vibrio proteolyticus</i> ATCC 15338<br>$\Delta$ vprh                                | (Ray et al., 2016) |
| $\Delta$ vprh/T6SS1 <sup>-</sup>                | <i>Vibrio proteolyticus</i> ATCC 15338<br>$\Delta$ vprh/ $\Delta$ tssG1                | This study         |
| $\Delta$ vprh/T6SS3 <sup>-</sup>                | <i>Vibrio proteolyticus</i> ATCC 15338<br>$\Delta$ vprh/ $\Delta$ tssL3                | This study         |
| $\Delta$ vprh/ $\Delta$ hns1                    | <i>Vibrio proteolyticus</i> ATCC 15338<br>$\Delta$ vprh/ $\Delta$ hns1                 | This study         |
| $\Delta$ vprh/ $\Delta$ hns1/T6SS1 <sup>-</sup> | <i>Vibrio proteolyticus</i> ATCC 15338<br>$\Delta$ vprh/ $\Delta$ hns1/ $\Delta$ tssG1 | This study         |
| $\Delta$ vprh/ $\Delta$ hns1/T6SS3 <sup>-</sup> | <i>Vibrio proteolyticus</i> ATCC 15338<br>$\Delta$ vprh/ $\Delta$ hns1/ $\Delta$ tssL3 | This study         |
| $\Delta$ vprh/ $\Delta$ hns1/ $\Delta$ tie1     | <i>Vibrio proteolyticus</i> ATCC 15338<br>$\Delta$ vprh/ $\Delta$ hns1/ $\Delta$ tie1  | This study         |

|                                                   |                                                                                             |                        |
|---------------------------------------------------|---------------------------------------------------------------------------------------------|------------------------|
| $\Delta vprh/\Delta hns1/\Delta tie2$             | <i>Vibrio proteolyticus</i> ATCC 15338<br>$\Delta vprh/\Delta hns1/\Delta tie2$             | This study             |
| $\Delta vprh/\Delta hns1/\Delta tie1/\Delta tie2$ | <i>Vibrio proteolyticus</i> ATCC 15338<br>$\Delta vprh/\Delta hns1/\Delta tie1/\Delta tie2$ | This study             |
| <i>V. para</i>                                    | <i>V. parahaemolyticus</i> RIMD 2210633<br>$\Delta tdhAS$ derivative (strain POR1)          | (Park et al., 2004)    |
| <i>Escherichia coli</i> XL-1 blue                 | XL-1 Blue                                                                                   | Purchased from Addgene |

845

846 **Supplemental Table S2. A list of plasmids used in this study.**

| Plasmid name       | Description                                                                  | Comments                                                                     | Source                 |
|--------------------|------------------------------------------------------------------------------|------------------------------------------------------------------------------|------------------------|
| pDM4               | a CmR and oriV <sup>R6K</sup> -containing suicide vector                     | Used as a backbone to construct plasmids for gene deletions in <i>Vibrio</i> | (O'Toole et al., 1996) |
| pDM4: <i>vprh</i>  | pDM4 containing 1 kb upstream and 1 kb downstream of <i>vprh</i> in its MCS  | Used to delete <i>vprh</i> in <i>V. proteolyticus</i>                        | (Ray et al., 2016)     |
| pDM4: <i>hns1</i>  | pDM4 containing 1 kb upstream and 1 kb downstream of <i>hns1</i> in its MCS  | Used to delete <i>hns1</i> in <i>V. proteolyticus</i>                        | This study             |
| pDM4: <i>tssG1</i> | pDM4 containing 1 kb upstream and 1 kb downstream of <i>tssG1</i> in its MCS | Used to delete <i>tssG1</i> in <i>V. proteolyticus</i>                       | (Ray et al., 2017)     |
| pDM4: <i>tssL3</i> | pDM4 containing 1 kb upstream and 1 kb downstream of <i>tssL3</i> in         | Used to delete <i>tssL3</i> in <i>V. proteolyticus</i>                       | This study             |

|                             |                                                                                                                                |                                                                                      |                        |
|-----------------------------|--------------------------------------------------------------------------------------------------------------------------------|--------------------------------------------------------------------------------------|------------------------|
|                             | its MCS                                                                                                                        |                                                                                      |                        |
| pDM4: <i>tie1</i>           | pDM4 containing 1 kb upstream and 1 kb downstream of the region corresponding to nucleotides 485-584 of <i>tie1</i> in its MCS | Used to delete a 100 bp region and inactivate <i>tie1</i> in <i>V. proteolyticus</i> | This study             |
| pDM4: <i>tie2</i>           | pDM4 containing 1 kb upstream and 1 kb downstream of <i>tie2</i> in its MCS                                                    | Used to delete <i>tie2</i> in <i>V. proteolyticus</i>                                | This study             |
| pBAD/Myc-His <sup>Kan</sup> | pBR322 ori-containing plasmid harboring a Kan <sup>R</sup> cassette, <i>araC</i> , and an MCS following a <i>Pbad</i> promoter | Used as a backbone to construct plasmids for arabinose-inducible gene expression     | (Salomon et al., 2013) |
| pTssL3                      | pBAD/Myc-His <sup>Kan</sup> containing the <i>tssL3</i> ORF in its MCS, in frame with a C-terminal Myc-His tag                 | Used for arabinose-inducible expression of TssL3                                     | This study             |
| pAts3                       | pBAD/Myc-His <sup>Kan</sup> containing the <i>ats3</i> ORF in its MCS, not fused to a C-terminal tag                           | Used for arabinose-inducible expression of Ats3                                      | This study             |
| pTie1                       | pBAD/Myc-His <sup>Kan</sup> containing the <i>tie1</i> ORF in its MCS, not fused to a C-terminal tag                           | Used for arabinose-inducible expression of Tie1                                      | This study             |
| pTie2                       | pBAD/Myc-His <sup>Kan</sup> containing the <i>tie2</i> ORF in its MCS, not fused to                                            | Used for arabinose-inducible expression of Tie2                                      | This study             |

|          |                                                                                                                          |                                                                    |                                                 |
|----------|--------------------------------------------------------------------------------------------------------------------------|--------------------------------------------------------------------|-------------------------------------------------|
|          | a C-terminal tag                                                                                                         |                                                                    |                                                 |
| pTie1-2  | pBAD/Myc-His <sup>Kan</sup> containing the ORFs of <i>tie1</i> and <i>tie2</i> in its MCS, not fused to a C-terminal tag | Used for arabinose-inducible expression of Tie1 and Tie2, together | This study                                      |
| pBAD33.1 | p15A ori-containing plasmid carrying a CmR gene, <i>araC</i> , and an MCS following a Pbad promoter.                     | Used for selection in competition assay                            | Purchased from Addgene; (Chung and Raetz, 2010) |

847

848 **Supplemental Table S3. A list of primers used in this study.**

| Primer name               | Sequence (5'-3')                         | Description                                                                     |
|---------------------------|------------------------------------------|---------------------------------------------------------------------------------|
| VprHNS1_UP_F_<br>Sacl     | CAGCGAGCTCAAGACACTGGA<br>CACGGTAG        | Used to amplify 1 kb upstream of <i>hns1</i> to construct pDM4: <i>hns1</i>     |
| VprHNS1_UP_R_<br>BamH     | CAACGGATCCGACCATTCTAT<br>GAATTTAATAAAGTC |                                                                                 |
| VprHNS1_DN_F_<br>BamHI    | CACCGGATCCTCGTAAGATTGG<br>TTTAAAAAAGG    | Used to amplify 1 kb downstream of <i>hns1</i> to construct pDM4: <i>hns1</i>   |
| VprHNS1_DN_R_<br>Sall     | CAACGTCGACCTATCGTTACCT<br>GTGCAAC        |                                                                                 |
| VprTssL3_UP_F_<br>SpeI    | CACCACTAGTTGAAGACAGCC<br>GTTTGCG         | Used to amplify 1 kb upstream of <i>tssL3</i> to construct pDM4: <i>tssL3</i>   |
| VprTssL3_UP_R_<br>HindIII | CAACAAGCTTAACTACCTACCT<br>GATCAC         |                                                                                 |
| VprTssL3_DN_F_<br>HindIII | CAGGAAGCTTTATGATCAAAAA<br>AATTCTTG       | Used to amplify 1 kb downstream of <i>tssL3</i> to construct pDM4: <i>tssL3</i> |
| VprTssL3_DN_R_<br>SphI    | CAACGCATGCCCGGTTTTACAG<br>CCCGATG        |                                                                                 |
| VPR_Tie1                  | CAAAGAGCTCGCGCAGACTTA                    | Used to amplify 1 kb                                                            |

|                       |                                                         |                                                                               |
|-----------------------|---------------------------------------------------------|-------------------------------------------------------------------------------|
| _Sacl_UP_F            | CGTTAAG                                                 | upstream of nucleotide                                                        |
| VPR_Tie1              | CACCTCTAGATTTTGTAGAATC                                  | 455 in <i>tie1</i> to construct pDM4: <i>tie1</i>                             |
| _Xbal_Up_R            | GTTTCGCCCTGG                                            |                                                                               |
| VPR_Tie1              | CACCTCTAGATGAGCTGGGCAT                                  | Used to amplify 1 kb downstream of nucleotide                                 |
| _Xbal_DN_F            | CAAGGCTGG                                               |                                                                               |
| VPR_Tie1              | CAAAGTCGACTTTGCAAATTTT                                  | 584 in <i>tie1</i> to construct pDM4: <i>tie1</i>                             |
| _Sall_DN_R            | GCAGCAAACG                                              |                                                                               |
| VPR_Tie2_UP_F_Sacl    | CATTGAGCTCACGGCCGGTGA<br>ATTTAACG                       | Used to amplify 1 kb upstream of <i>tie2</i> to construct pDM4: <i>tie2</i>   |
| VPR_Tie2_UP_R_HindIII | CAACAAGCTTAGGCCTTTCCTT<br>TTTATTAACGTG                  |                                                                               |
| VPR_Tie2_DN_F_HindIII | CACGAAGCTTTCCTTGCCAACA<br>TAGCGG                        | Used to amplify 1 kb downstream of <i>tie2</i> to construct pDM4: <i>tie2</i> |
| VPR_Tie2_DN_R_Sall    | CAGCGTCGACAATCTATAACAC<br>TCACCG                        |                                                                               |
| tssL3_F_pBADfix       | GCTAACAGGAGGAATTAACCAT<br>GGCAGGACTTTTTAACG             | Used to amplify <i>tssL3</i> to construct pTssL3                              |
| tssL3_R_pBADfix       | TTTTGTTCGGGCCCAAGCTTTT<br>TCTGCGCTCTTCTTATCG            |                                                                               |
| Tie1_F_pBADfix        | GCTAACAGGAGGAATTAACCAT<br>GATAAATGATTTACAAAATGCC        | Used to amplify <i>tie1</i> to construct pTie1 and pTie1-2                    |
| Tie1_R_pBADfix        | TTTTGTTCGGGCCCAAGCTTGA<br>ATGTGCTCAGAATGTCCTGC          | Used to amplify <i>tie1</i> to construct pTie1                                |
| Tie2_F_pBADfix        | TTTTGTTCGGGCCCAAGCTTTC<br>ACGCGGCTTCCGGGTGTG            | Used to amplify <i>tie2</i> to construct pTie2                                |
| Tie1_Tie2_R_pBADfix   | TTTTGTTCGGGCCCAAGCTTCG<br>CGGCTTCCGGGTGTGGAGGCA<br>GTAC | Used to amplify <i>tie2</i> to construct pTie2 and pTie1-2                    |
| Ats3_F_pBADfix        | GCTAACAGGAGGAATTAACCAT<br>GGAAAGAAAATCTATAACAATC        | Used to amplify <i>Ats3</i> to construct pAts3                                |
| Ats3_R_pBADfix        | TTTTGTTCGGGCCCAAGCTTTT<br>AGCGCTGATAGCGTTTG             |                                                                               |

849

850 **Resource availability:**

851

852 ***Lead Contact:***

853 Further information and requests for resources and reagents should be directed to

854 and will be fulfilled by the lead contact, Motti Gerlic ([mgerlic@tauex.tau.ac.il](mailto:mgerlic@tauex.tau.ac.il)).

855

856 ***Materials availability***

857 Materials are available from the authors upon reasonable request.

858

859 ***Data and code availability***

860 Data are, available from the authors upon reasonable request. This study did not

861 generate new codes.

862

863

864 **Supplemental information**

865 **Supplemental Figures**

866

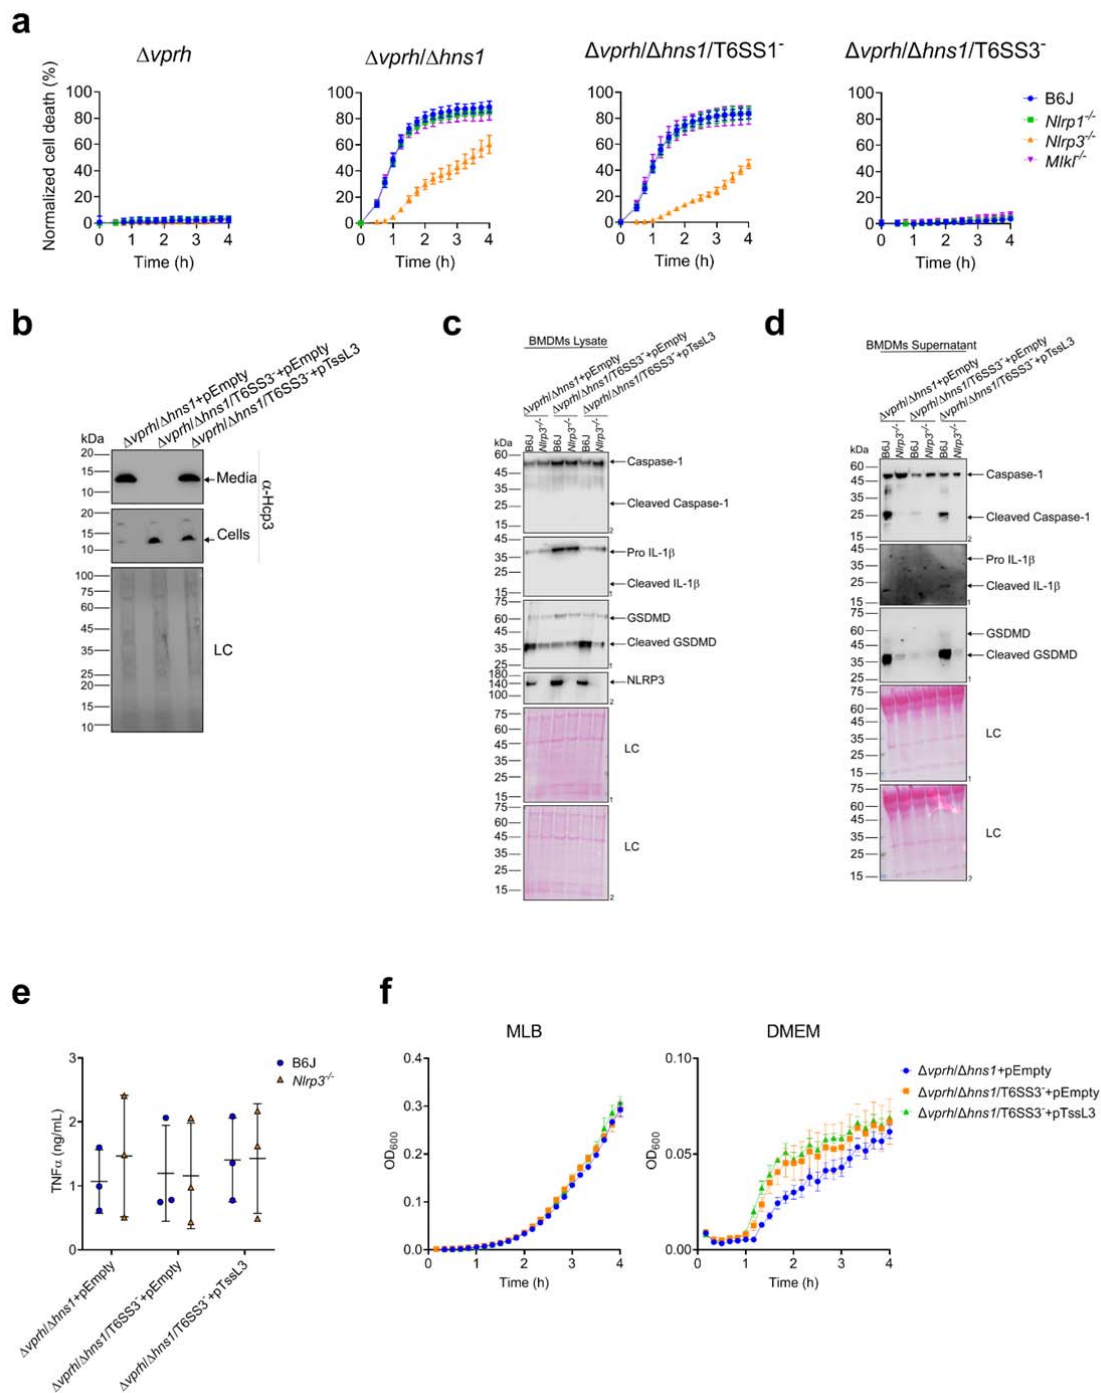

867



868 **Supplemental Figure 1 (Related to Figure 3): T6SS3 activates the NLRP3**  
869 **inflammasome in BMDMs**

870 **(a)** PI uptake was assessed using real-time microscopy (IncucyteZOOM). The data  
871 are another depiction of the results shown in the experiment described in main  
872 Figure 3a. **(b)** The expression (cells) and secretion (media) of VgrG1 and Hcp3 from  
873 *V. proteolyticus* strains were detected by immunoblotting using specific antibodies.  
874 Loading control (LC) is shown for total protein lysate. An arrow denotes the expected  
875 band size of Hcp3. **(c-d)** NLRP3, Caspase-1, GSDMD, and IL-1 $\beta$  were detected in  
876 BMDM lysates (c) and supernatants (d) from experiments described in main Figure  
877 3e-f by immunoblotting (the number on the right side of each blot denotes the blot  
878 number). **(e)** Cell supernatants from experiments described in main Figure 3e-f were  
879 collected 3 hours post infection. TNF $\alpha$  secretion was measured using a commercial  
880 ELISA kit. **(f)** Growth of *V. proteolyticus* strains in MLB or DMEM media  
881 supplemented with 0.05% arabinose at 30°C, measured as absorbance at 600 nm  
882 (OD<sub>600</sub>). The data shown in (a-b, f) and (c-d) are a representative experiment out of  
883  $n \geq 3$  and two independent experiments, respectively. Statistical comparisons in (e)  
884 were performed using RM two-way ANOVA, followed by Turkey's multiple  
885 comparison test. The results are shown as the mean  $\pm$  SD of 3 independent  
886 experiments; significant differences were considered as  $P < 0.05$ .

887

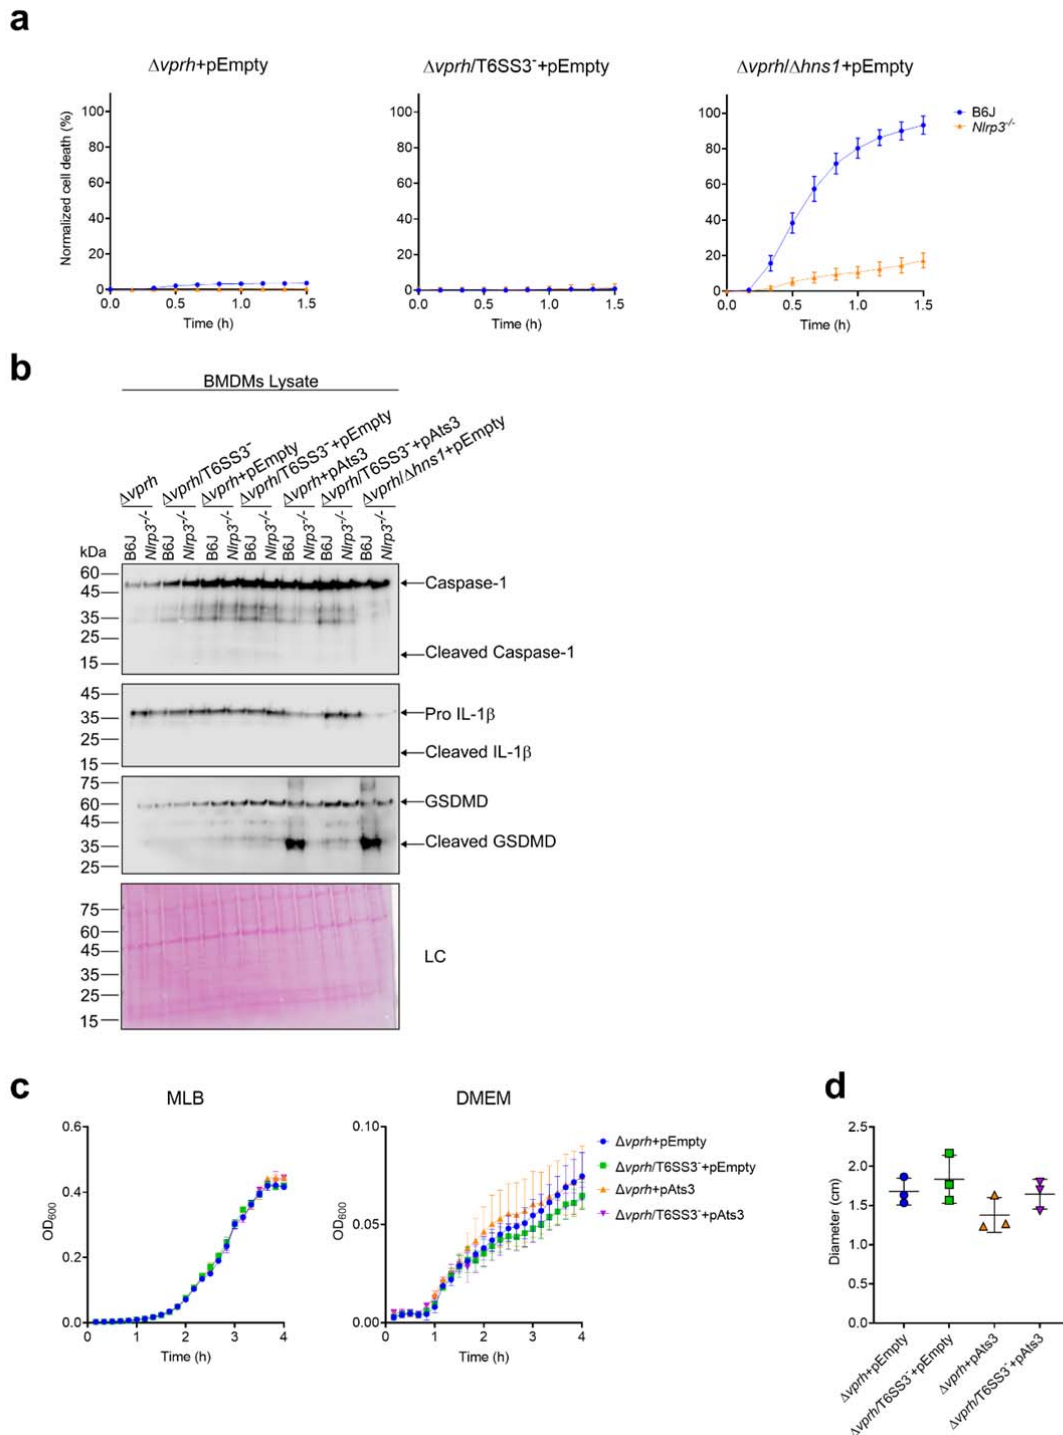

888

889 **Supplemental Figure 2 (Related to Figure 5): Activation of T6SS3 by Ats3 is**  
 890 **sufficient to induce the NLRP3 inflammasome**

891 **(a)** PI uptake was assessed using real-time microscopy (IncucyteZOOM). The data  
 892 are another depiction of the results shown in the experiment described in main  
 893 Figure 5d-g. **(b)** NLRP3, Caspase-1, GSDMD, and IL-1 $\beta$  were detected in BMDM

894 lysates by immunoblotting. Arrows denote the expected band size. The samples  
895 were taken from the experiment described in main Figure 5d-g. **(c)** Growth of *V.*  
896 *proteolyticus* strains, used in main Figure 5, in MLB or DMEM media supplemented  
897 with 0.05% arabinose at 30°C, measured as absorbance at 600 nm (OD<sub>600</sub>). **(d)**  
898 Swimming motility of *V. proteolyticus* strains, measured as migration of a soft-agar  
899 plate supplemented with 0.1% arabinose after overnight incubation at 30°C. The  
900 data are shown as the mean ± SD of 3 biological repeats. Statistical comparison was  
901 performed using RM one-way ANOVA, follow by Turkey's multiple comparison test.

**a**

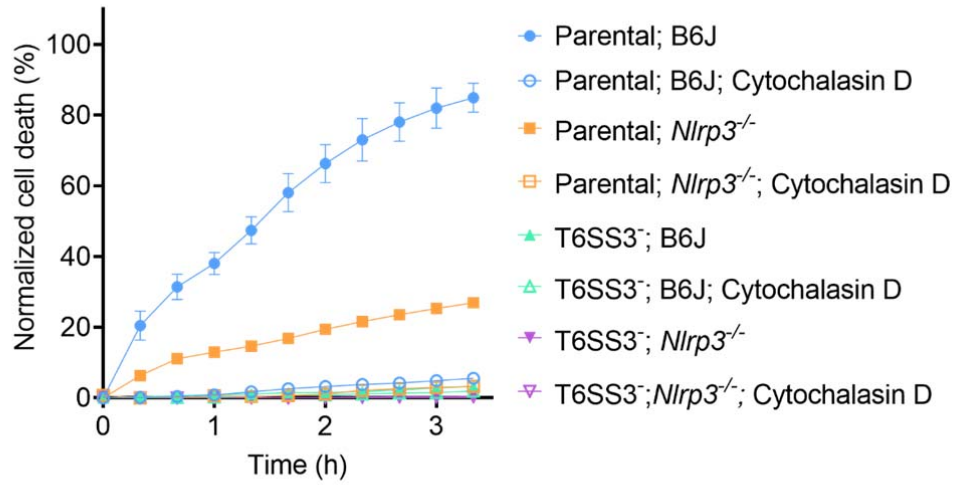

**b**

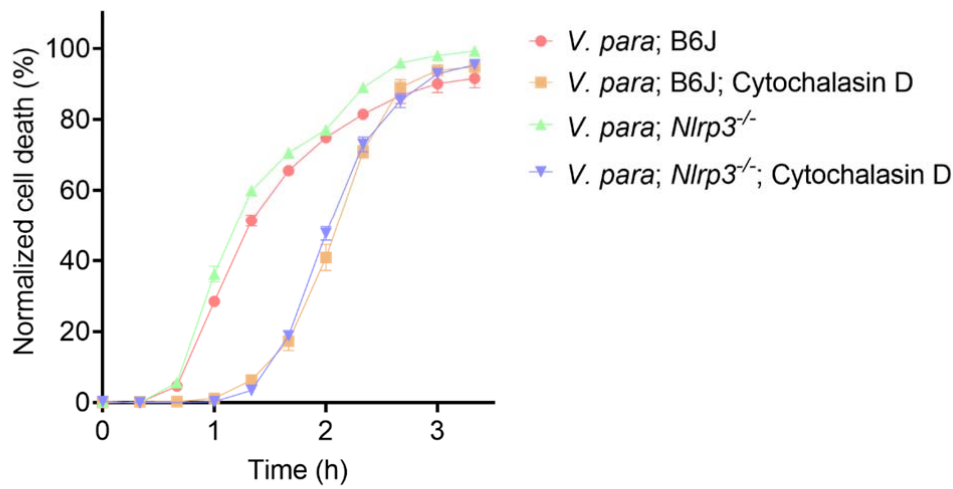

**c**

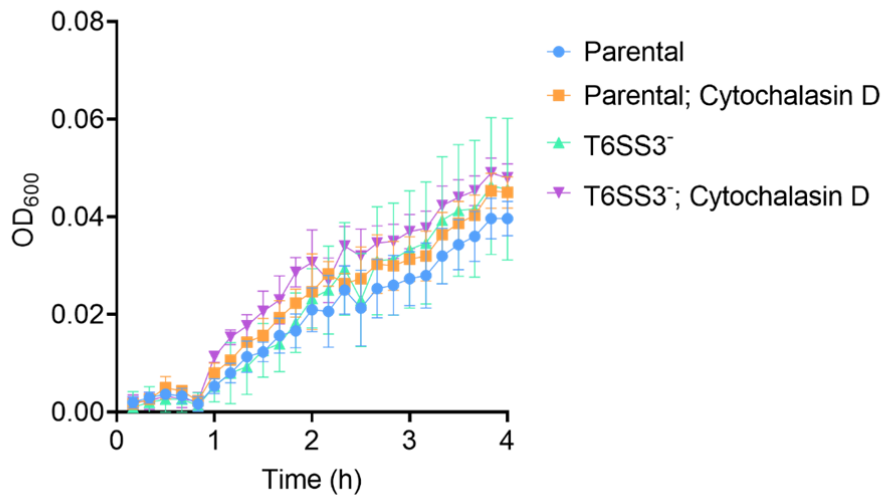

903 **Supplemental Figure 3 (Related to Figure 6): *V. proteolyticus* T6SS3 activity**  
904 **requires phagocytosis**

905 **(a-b)** Approximately  $3.5 \times 10^4$  wild-type and *Nlrp3*<sup>-/-</sup> BMDMs were seeded into 96-well  
906 plates in 6 replicates and were primed using LPS (100 ng/mL) for 3 hours prior to  
907 infection with *V. proteolyticus* strains at MOI 5. **(a-b)** PI uptake was assessed using  
908 real-time microscopy (IncucyteZOOM) and then graphed as the AUC of the  
909 percentage of PI-positive cells normalized to the number of cells in the wells.  
910 Parental, *V. proteolyticus*  $\Delta vprh+pAts3$ ; *V. para*, *V. parahaemolyticus* RIMD 2210633  
911  $\Delta tdhAS$  derivative. **(c)** Growth of *V. proteolyticus* strains used in main Figure 6a-e in  
912 DMEM media at 37°C, measured as absorbance at 600 nm (OD<sub>600</sub>). Arabinose  
913 (0.05% w/v) was added to induce expression from the plasmid. Where indicated, 5  
914  $\mu$ M cytochalasin D were added to cells 45 minutes prior infection to inhibit  
915 phagocytosis. The data in (a-c) are shown as the mean  $\pm$  SD, and are a  
916 representative experiment out of n=3 independent experiments.  
917

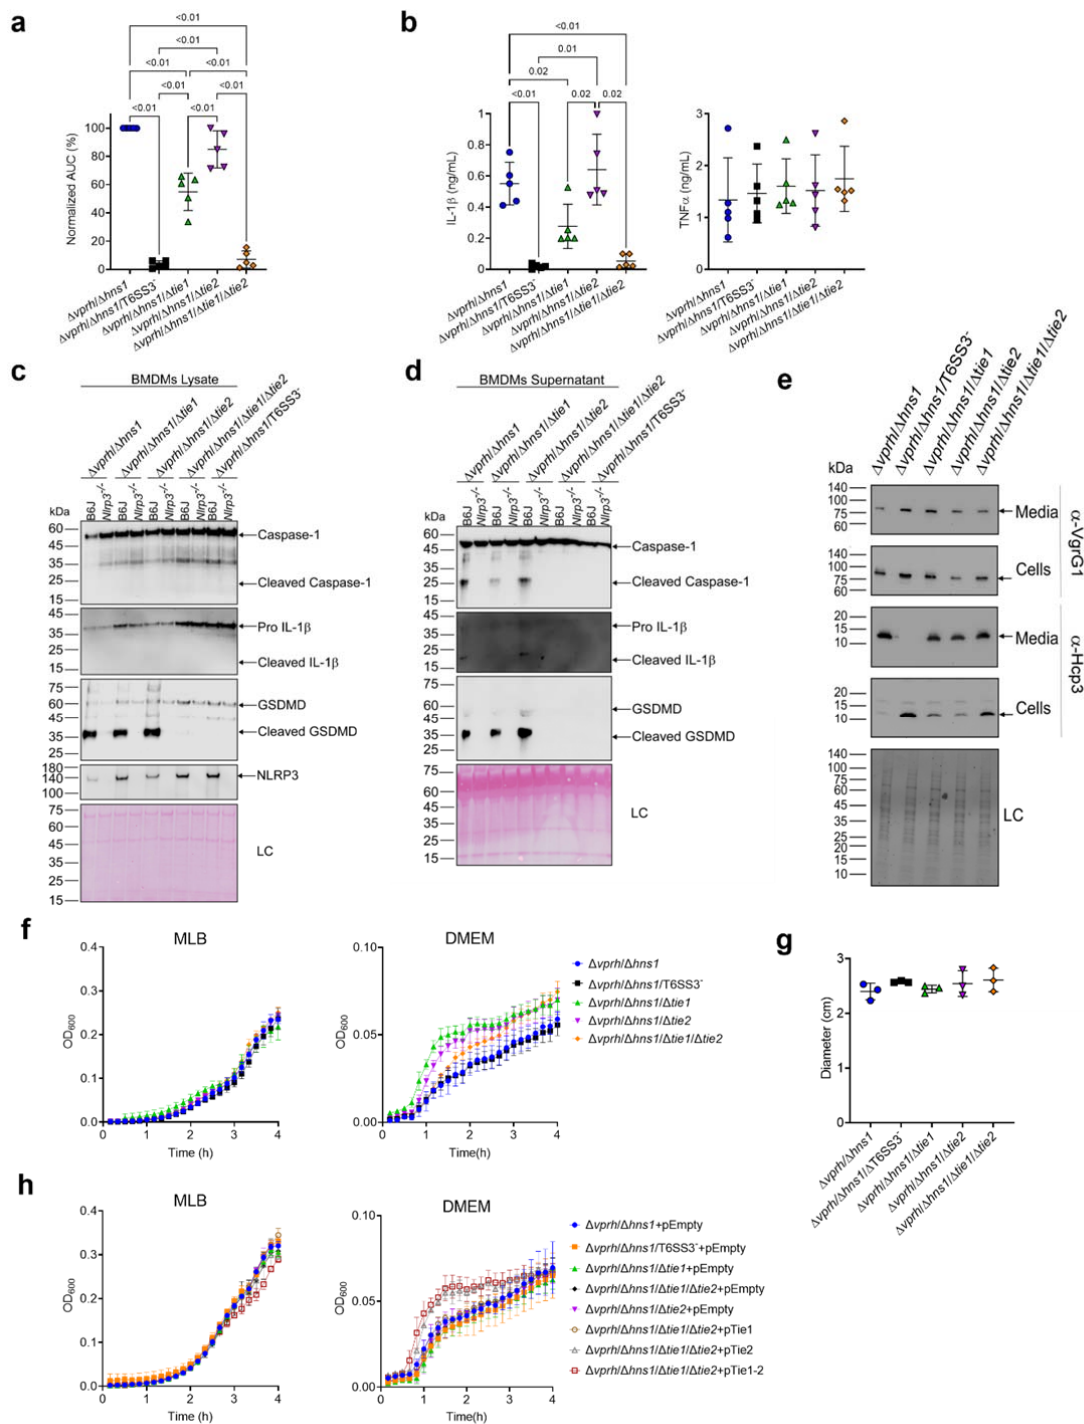

918

919 **Supplemental Figure 4 (Related to Figure 7): Two T6SS3 effectors are**  
 920 **necessary and sufficient to induce pyroptotic cell death**

921 (a-d) Approximately  $3.5 \times 10^4$  wild-type and  $Nlrp3^{-/-}$  BMDMs were seeded into 96-well  
 922 plates in 6 replicates and were primed using LPS (100 ng/mL) for 3 hours prior to  
 923 infection with *V. proteolyticus* strains at MOI 5. (a) PI uptake was assessed using

924 real-time microscopy (IncucyteZOOM) and then graphed as the AUC of the  
925 percentage of PI-positive cells normalized to the number of cells in the wells. (b) Cell  
926 supernatants from experiments described in (a) were collected 3 hours post  
927 infection. IL-1 $\beta$  and TNF $\alpha$  secretion were measured using commercial ELISA kits. (c-  
928 d) NLRP3, Caspase-1, GSDMD, and IL-1 $\beta$  were detected in BMDM lysates (c) and  
929 supernatants (d) by immunoblotting. Arrows denote the expected band size. (e) The  
930 expression (cells) and secretion (media) of VgrG1 and Hcp3 from *V. proteolyticus*  
931 strains were detected by immunoblotting using specific antibodies. Loading control  
932 (LC) is shown for total protein lysate. (f-h) Growth of *V. proteolyticus* strains, used in  
933 (a-d) and in main Figure 7c-g, in MLB or DMEM media (in h, 0.05% arabinose was  
934 added at t=0 h to induce expression from the plasmid) at 30°C, measured as  
935 absorbance at 600 nm (OD<sub>600</sub>). (g) Motility of *V. proteolyticus* used in (a-d).  
936 Swimming motility of *V. proteolyticus* strains, measured as migration on a soft-agar  
937 plate after overnight incubation at 30°C. Statistical comparisons in (a-b) and (g) were  
938 performed using RM one-way ANOVA, followed by Dunnett's multiple comparison  
939 test. The results are shown as the mean  $\pm$  SD of 3 independent experiments; a  
940 significant difference was considered as  $P < 0.05$ . The results in (c-h) are of a  
941 representative experiment out of  $n \geq 2$  independent experiments with similar results.  
942  
943

944 **References**

- 945 Aubert, D.F., Xu, H., Yang, J., Shi, X., Gao, W., Li, L., Bisaro, F., Chen, S., Valvano,  
946 M.A., and Shao, F. (2016). A Burkholderia Type VI Effector Deamidates Rho  
947 GTPases to Activate the Pyrin Inflammasome and Trigger Inflammation. *Cell Host*  
948 *Microbe* *19*, 664–674.
- 949 Baker-Austin, C., Oliver, J.D., Alam, M., Ali, A., Waldor, M.K., Qadri, F., and  
950 Martinez-Urtaza, J. (2018). *Vibrio* spp. infections. *Nat. Rev. Dis. Prim.* *4*, 8.
- 951 Bauernfried, S., Scherr, M.J., Pichlmair, A., Duderstadt, K.E., and Hornung, V.  
952 (2021). Human NLRP1 is a sensor for double-stranded RNA. *Science* (80-. ). *371*,  
953 eabd0811.
- 954 Bensadoun, A., and Weinstein, D. (1976). Assay of proteins in the presence of  
955 interfering materials. *Anal. Biochem.* *70*, 241–250.
- 956 Bingle, L.E., Bailey, C.M., and Pallen, M.J. (2008). Type VI secretion: a beginner's  
957 guide. *Curr. Opin. Microbiol.* *11*, 3–8.
- 958 Bowden, T.J., Bricknell, I.R., and Preziosi, B.M. (2018). Comparative pathogenicity  
959 of *Vibrio* spp., *Photobacterium damsela* ssp. *damsela* and five isolates of  
960 *Aeromonas salmonicida* ssp. *achromogenes* in juvenile Atlantic halibut  
961 (*Hippoglossus hippoglossus*). *J. Fish Dis.* *41*, 79–86.
- 962 Boyer, F., Fichant, G., Berthod, J., Vandenbrouck, Y., and Attree, I. (2009).  
963 Dissecting the bacterial type VI secretion system by a genome wide in silico  
964 analysis: What can be learned from available microbial genomic resources? *BMC*  
965 *Genomics* *12*, 104.
- 966 Bröms, J.E., Sjöstedt, A., and Lavander, M. (2010). The role of the *Francisella*  
967 *tularensis* pathogenicity island in type VI secretion, intracellular survival, and  
968 modulation of host cell signaling. *Front. Microbiol.* *1*, 1–17.



- 969 Brown, S.S., and Spudich, J.A. (1979). Cytochalasin inhibits the rate of elongation of  
970 actin filament fragments. *J. Cell Biol.* *83*, 657–662.
- 971 Bruto, M., James, A., Petton, B., Labreuche, Y., Chenivesse, S., Alunno-Bruscia, M.,  
972 Polz, M.F., and Le Roux, F. (2017). *Vibrio crassostreae*, a benign oyster colonizer  
973 turned into a pathogen after plasmid acquisition. *ISME J.* *11*, 1043–1052.
- 974 Burdette, D.L., Yarbrough, M.L., Orvedahl, A., Gilpin, C.J., and Orth, K. (2008).  
975 *Vibrio parahaemolyticus* orchestrates a multifaceted host cell infection by induction  
976 of autophagy, cell rounding, and then cell lysis. *Proc. Natl. Acad. Sci. U. S. A.* *105*,  
977 12497–12502.
- 978 Cervino, J.M., Thompson, F.L., Gomez-Gil, B., Lorence, E.A., Goreau, T.J., Hayes,  
979 R.L., Winiarski-Cervino, K.B., Smith, G.W., Hughen, K., and Bartels, E. (2008). The  
980 *Vibrio* core group induces yellow band disease in Caribbean and Indo-Pacific reef-  
981 building corals. *J. Appl. Microbiol.* *105*, 1658–1671.
- 982 Chen, H., Yang, D., Han, F., Tan, J., Zhang, L., Xiao, J., Zhang, Y., and Liu, Q.  
983 (2017). The Bacterial T6SS Effector EvpP Prevents NLRP3 Inflammasome  
984 Activation by Inhibiting the Ca<sup>2+</sup>-Dependent MAPK-Jnk Pathway. *Cell Host*  
985 *Microbe* *21*, 47–58.
- 986 Chu, B., Yao, F., Cheng, C., Wu, Y., Mei, Y., Li, X., Liu, Y., Wang, P., Hou, L., and  
987 Zou, X. (2014). The potential role of As-sumo-1 in the embryonic diapause process  
988 and early embryo development of *Artemia sinica*. *PLoS One* *9*, e85343.
- 989 Chung, H.S., and Raetz, C.R.H. (2010). Interchangeable domains in the Kdo  
990 transferases of *Escherichia coli* and *Haemophilus influenzae*. *Biochemistry* *49*, 4126–  
991 4137.
- 992 Church, L.D., Cook, G.P., and McDermott, M.F. (2008). Primer: inflammasomes and  
993 interleukin 1 $\beta$  in inflammatory disorders. *Nat. Clin. Pract. Rheumatol.* *4*, 34–42.

994 Clemens, D.L., Lee, B.Y., and Horwitz, M.A. (2018). The Francisella Type VI  
995 secretion system. *Front. Cell. Infect. Microbiol.* **8**, 1–20.

996 Cohen, H., Baram, N., Edry-Botzer, L., Munitz, A., Salomon, D., and Gerlic, M.  
997 (2020). Vibrio pore-forming leukocidin activates pyroptotic cell death via the NLRP3  
998 inflammasome. *Emerg. Microbes Infect.* **9**, 278–290.

999 Conos, S.A., Chen, K.W., De Nardo, D., Hara, H., Whitehead, L., Núñez, G.,  
1000 Masters, S.L., Murphy, J.M., Schroder, K., Vaux, D.L., et al. (2017). Active MLKL  
1001 triggers the NLRP3 inflammasome in a cell-intrinsic manner. *Proc. Natl. Acad. Sci.*  
1002 *U. S. A.* **E961–E969**.

1003 Dar, Y., Salomon, D., and Bosis, E. (2018). The Antibacterial and Anti-Eukaryotic  
1004 Type VI Secretion System MIX-Effector Repertoire in Vibrionaceae. *Mar. Drugs* **16**,  
1005 433.

1006 Dinarello, C.A. (2018). Overview of the IL-1 family in innate inflammation and  
1007 acquired immunity. *Immunol. Rev.* **281**, 8–27.

1008 Dorman, C.J. (2004). H-NS: A universal regulator for a dynamic genome. *Nat. Rev.*  
1009 *Microbiol.* **2**, 391–400.

1010 Flanagan, M.D., and Lin, S. (1980). Cytochalasins block actin filament elongation by  
1011 binding to high affinity sites associated with F-actin. *J. Biol. Chem.* **255**, 835–838.

1012 Franklin, B.S., Bossaller, L., De Nardo, D., Ratter, J.M., Stutz, A., Engels, G.,  
1013 Brenker, C., Nordhoff, M., Mirandola, S.R., Al-Amoudi, A., et al. (2014). The adaptor  
1014 ASC has extracellular and “prionoid” activities that propagate inflammation. *Nat.*  
1015 *Immunol.* **15**, 727–737.

1016 Frans, I., Michiels, C.W., Bossier, P., Willems, K.A., Lievens, B., and Rediers, H.  
1017 (2011). *Vibrio anguillarum* as a fish pathogen: Virulence factors, diagnosis and  
1018 prevention. *J. Fish Dis.* **34**, 643–661.

1019 Geller, A.M., Pollin, I., Zlotkin, D., Danov, A., Nachmias, N., Andreopoulos, W.B.,  
1020 Shemesh, K., and Levy, A. (2021). The extracellular contractile injection system is  
1021 enriched in environmental microbes and associates with numerous toxins. *Nat.*  
1022 *Commun.* *12*, 1–15.

1023 Gibson, D.G., Young, L., Chuang, R.Y., Venter, J.C., Hutchison, C.A., and Smith,  
1024 H.O. (2009). Enzymatic assembly of DNA molecules up to several hundred  
1025 kilobases. *Nat. Methods* *6*, 343–345.

1026 Hachani, A., Wood, T.E., and Filloux, A. (2016). Type VI secretion and anti-host  
1027 effectors. *Curr. Opin. Microbiol.* *29*, 81–93.

1028 Isherwood, B., Timpson, P., Mcghee, E.J., Anderson, K.I., Canel, M., Serrels, A.,  
1029 Brunton, V.G., and Carragher, N.O. (2011). Live cell in vitro and in vivo imaging  
1030 applications: Accelerating drug discovery. *Pharmaceutics* *3*, 141–170.

1031 Jiang, F., Waterfield, N.R., Yang, J., Yang, G., and Jin, Q. (2014). A *Pseudomonas*  
1032 *aeruginosa* type VI secretion phospholipase D effector targets both prokaryotic and  
1033 eukaryotic cells. *Cell Host Microbe* *15*, 600–610.

1034 Jiang, S., Zhou, Z., Sun, Y., Zhang, T., and Sun, L. (2020). Coral gasdermin triggers  
1035 pyroptosis. *Sci. Immunol.* *5*, eabd2591.

1036 Lamkanfi, M., and Dixit, V.M. (2014). Mechanisms and functions of inflammasomes.  
1037 *Cell* *157*, 1013–1022.

1038 Lawlor, K.E., Khan, N., Mildenhall, A., Gerlic, M., Croker, B.A., D’Cruz, A.A., Hall, C.,  
1039 Kaur Spall, S., Anderton, H., Masters, S.L., et al. (2015). RIPK3 promotes cell death  
1040 and NLRP3 inflammasome activation in the absence of MLKL. *Nat. Commun.* *18*,  
1041 6282.

1042 Li, P., Kinch, L.N., Ray, A., Dalia, A.B., Cong, Q., Nunan, L.M., Camilli, A., Grishin,  
1043 N. V., Salomon, D., and Orth, K. (2017). Acute hepatopancreatic necrosis disease-

1044 causing *Vibrio parahaemolyticus* strains maintain an antibacterial type VI secretion  
1045 system with versatile effector repertoires. *Appl. Environ. Microbiol.* **83**, 1–17.

1046 Lieberman, J., Wu, H., and Kagan, J.C. (2019). Gasdermin D activity in inflammation  
1047 and host defense. *Sci. Immunol.* **4**, eaav1447.

1048 Liu, X., Zhang, Z., Ruan, J., Pan, Y., Magupalli, V.G., Wu, H., and Lieberman, J.  
1049 (2016). Inflammasome-activated gasdermin D causes pyroptosis by forming  
1050 membrane pores. *Nature* **535**, 153–158.

1051 Lu, S., Wang, J., Chitsaz, F., Derbyshire, M.K., Geer, R.C., Gonzales, N.R., Gwadz,  
1052 M., Hurwitz, D.I., Marchler, G.H., Song, J.S., et al. (2020). CDD/SPARCLE: The  
1053 conserved domain database in 2020. *Nucleic Acids Res.* **48**, D265–D268.

1054 Luchetti, G., Roncaioli, J.L., Chavez, R.A., Schubert, A.F., Kofoed, E.M., Reja, R.,  
1055 Cheung, T.K., Liang, Y., Webster, J.D., Lehoux, I., et al. (2021). *Shigella* ubiquitin  
1056 ligase IpaH7.8 targets gasdermin D for degradation to prevent pyroptosis and enable  
1057 infection. *Cell Host Microbe* **29**, 1521-1530.e10.

1058 Ma, A.T., McAuley, S., Pukatzki, S., and Mekalanos, J.J. (2009). Translocation of a  
1059 *Vibrio cholerae* Type VI Secretion Effector Requires Bacterial Endocytosis by Host  
1060 Cells. *Cell Host Microbe* **5**, 234–243.

1061 Man, S.M., Karki, R., and Kanneganti, T.D. (2017). Molecular mechanisms and  
1062 functions of pyroptosis, inflammatory caspases and inflammasomes in infectious  
1063 diseases. *Immunol. Rev.* 61–75.

1064 Miller, K.A., Tomberlin, K.F., and Dziejman, M. (2019). *Vibrio* variations on a type  
1065 three theme. *Curr. Opin. Microbiol.* **47**, 66–73.

1066 Monjarás Fera, J., and Valvano, M.A. (2020). An Overview of Anti-Eukaryotic T6SS  
1067 Effectors. *Front. Cell. Infect. Microbiol.* **10**, 584751.

1068 Mougous, J.D., Cuff, M.E., Raunser, S., Shen, A., Zhou, M., Gifford, C.A., Goodman,

- 1069 A.L., Joachimiak, G., Ordoñez, C.L., Lory, S., et al. (2006). A virulence locus of  
1070 *Pseudomonas aeruginosa* encodes a protein secretion apparatus. *Science* (80- ).  
1071 312, 1526–1530.
- 1072 O’Toole, R., Milton, D.L., and Wolf-Watz, H. (1996). Chemotactic motility is required  
1073 for invasion of the host by the fish pathogen *Vibrio anguillarum*. *Mol. Microbiol.* 19,  
1074 625–637.
- 1075 Park, K.S., Ono, T., Rokuda, M., Jang, M.H., Iida, T., and Honda, T. (2004).  
1076 Cytotoxicity and Enterotoxicity of the Thermostable Direct Hemolysin-Deletion  
1077 Mutants of *Vibrio parahaemolyticus*. *Microbiol. Immunol.* 48, 313–318.
- 1078 Potter, S.C., Luciani, A., Eddy, S.R., Park, Y., Lopez, R., and Finn, R.D. (2018).  
1079 HMMER web server: 2018 update. *Nucleic Acids Res.* 46, W200–W204.
- 1080 Proell, M., Gerlic, M., Mace, P.D., Reed, J.C., and Riedl, S.J. (2013). The CARD  
1081 plays a critical role in ASC foci formation and inflammasome signalling. *Biochem. J.*  
1082 449, 613–621.
- 1083 Pukatzki, S., Ma, A.T., Sturtevant, D., Krastins, B., Sarracino, D., Nelson, W.C.,  
1084 Heidelberg, J.F., and Mekalanos, J.J. (2006). Identification of a conserved bacterial  
1085 protein secretion system in *Vibrio cholerae* using the *Dictyostelium* host model  
1086 system. *Proc. Natl. Acad. Sci. U. S. A.* 103, 1528–1533.
- 1087 Pukatzki, S., Ma, A.T., Revel, A.T., Sturtevant, D., and Mekalanos, J.J. (2007). Type  
1088 VI secretion system translocates a phage tail spike-like protein into target cells  
1089 where it cross-links actin. *Proc. Natl. Acad. Sci. U. S. A.* 104, 15508–15513.
- 1090 Ray, A., Kinch, L.N., de Souza Santos, M., Grishin, N. V., Orth, K., and Salomon, D.  
1091 (2016). Proteomics Analysis Reveals Previously Uncharacterized Virulence Factors  
1092 in *Vibrio proteolyticus*. *MBio* 7, e01077-16.
- 1093 Ray, A., Schwartz, N., Souza Santos, M., Zhang, J., Orth, K., and Salomon, D.

1094 (2017). Type VI secretion system MIX-effectors carry both antibacterial and anti-  
1095 eukaryotic activities. *EMBO Rep.* *18*, 1978–1990.

1096 Rosales-Reyes, R., Skeldon, A.M., Aubert, D.F., and Valvano, M.A. (2012). The  
1097 Type VI secretion system of *Burkholderia cenocepacia* affects multiple Rho family  
1098 GTPases disrupting the actin cytoskeleton and the assembly of NADPH oxidase  
1099 complex in macrophages. *Cell. Microbiol.* *14*, 255–273.

1100 Roux, F. Le, Wegner, K.M., Baker-Austin, C., Vezzulli, L., Osorio, C.R., Amaro, C.,  
1101 Ritchie, J.M., Defoirdt, T., Destoumieux-Garzón, D., Blokesch, M., et al. (2015). The  
1102 emergence of *Vibrio* pathogens in Europe: ecology, evolution, and pathogenesis  
1103 (Paris, 11–12th March 2015). *Front. Microbiol.* *6*, 830.

1104 Sagulenko, V., Vitak, N., Vajjhala, P.R., Vince, J.E., and Stacey, K.J. (2018).  
1105 Caspase-1 Is an Apical Caspase Leading to Caspase-3 Cleavage in the AIM2  
1106 Inflammasome Response, Independent of Caspase-8. *J. Mol. Biol.* *430*, 238–247.

1107 Salomon, D., Gonzalez, H., Updegraff, B.L., and Orth, K. (2013). *Vibrio*  
1108 *parahaemolyticus* Type VI Secretion System 1 Is Activated in Marine Conditions to  
1109 Target Bacteria, and Is Differentially Regulated from System 2. *PLoS One* *8*,  
1110 e61086.

1111 Salomon, D., Klimko, J.A., and Orth, K. (2014). H-NS regulates the *Vibrio*  
1112 *parahaemolyticus* type VI secretion system 1. *Microbiology* *160*, 1867–1873.

1113 Salomon, D., Klimko, J.A., Trudgian, D.C., Kinch, L.N., Grishin, N. V., Mirzaei, H.,  
1114 and Orth, K. (2015). Type VI Secretion System Toxins Horizontally Shared between  
1115 Marine Bacteria. *PLOS Pathog.* *11*, e1005128.

1116 Sana, T.G., Baumann, C., Merdes, A., Soscia, C., Rattei, T., Hachani, A., Jones, C.,  
1117 Bennett, K.L., Filloux, A., Superti-Furga, G., et al. (2015). Internalization of  
1118 *Pseudomonas aeruginosa* strain PAO1 into epithelial cells is promoted by interaction

1119 of a T6SS effector with the microtubule network. *MBio* 6, 1–11.

1120 Schroder, K., and Tschopp, J. (2010). The Inflammasomes. *Cell* 140, 821–832.

1121 Shalom, G., Shaw, J.G., and Thomas, M.S. (2007). In vivo expression technology  
1122 identifies a type VI secretion system locus in *Burkholderia pseudomallei* that is  
1123 induced upon invasion of macrophages. *Microbiology* 153, 2689–2699.

1124 Shao, B.-Z., Xu, Z.-Q., Han, B.-Z., Su, D.-F., and Liu, C. (2015). NLRP3  
1125 inflammasome and its inhibitors: a review. *Front. Pharmacol.* 6, 262.

1126 Shi, J., Zhao, Y., Wang, K., Shi, X., Wang, Y., Huang, H., Zhuang, Y., Cai, T., Wang,  
1127 F., and Shao, F. (2015). Cleavage of GSDMD by inflammatory caspases determines  
1128 pyroptotic cell death. *Nature* 526, 660–665.

1129 Stephen F.Altschul, Warren Gish, Webb Miller, Eugene W.Myers, D.J.L. (1990).  
1130 Basic local alignment search tool. *J. Mol. Biol.* 215, 403–410.

1131 Swanson, K. V., Deng, M., and Ting, J.P.-Y. (2019). The NLRP3 inflammasome:  
1132 molecular activation and regulation to therapeutics. *Nat. Rev. Immunol.* 19, 477–489.

1133 Tran, H.R., Grebenc, D.W., Klein, T.A., Whitney, J.C., Whitney, J.C., and Degroote,  
1134 M. (2021). Bacterial type VII secretion : An important player in host-microbe and  
1135 microbe-microbe interactions. 115, 478–489.

1136 Trouplin, V., Boucherit, N., Gorvel, L., Conti, F., Mottola, G., and Ghigo, E. (2013).  
1137 Bone marrow-derived macrophage production. *J. Vis. Exp.* e50966.

1138 Tsuchiya, K., Nakajima, S., Hosojima, S., Thi Nguyen, D., Hattori, T., Manh Le, T.,  
1139 Hori, O., Mahib, M.R., Yamaguchi, Y., Miura, M., et al. (2019). Caspase-1 initiates  
1140 apoptosis in the absence of gasdermin D. *Nat. Commun.* 10, 2091.

1141 Verschuere, L., Heang, H., Criel, G., Sorgeloos, P., and Verstraete, W. (2000).  
1142 Selected bacterial strains protect *Artemia* spp. from the Pathogenic effects of *Vibrio*  
1143 *proteolyticus* CW8T2. *Appl. Environ. Microbiol.* 66, 1139–1146.

1144 Vezzulli, L., Grande, C., Reid, P.C., Hélaouët, P., Edwards, M., Höfle, M.G., Brettar,  
1145 I., Colwell, R.R., and Pruzzo, C. (2016). Climate influence on *Vibrio* and associated  
1146 human diseases during the past half-century in the coastal North Atlantic. *Proc. Natl.*  
1147 *Acad. Sci. U. S. A.* *113*, E5062–E5071.

1148 Wallach, D., Kang, T.B., and Kovalenko, A. (2014). Concepts of tissue injury and cell  
1149 death in inflammation: A historical perspective. *Nat. Rev. Immunol.* *14*, 51–59.

1150 Wang, X., Wang, Q., Xiao, J., Liu, Q., Wu, H., Xu, L., and Zhang, Y. (2009).  
1151 *Edwardsiella tarda* T6SS component *evpP* is regulated by *esrB* and iron , and plays  
1152 essential roles in the invasion of fish. *Fish Shellfish Immunol.* *27*, 469–477.

1153 Wen, H., Miao, E.A., and Ting, J.P.Y. (2013). Mechanisms of NOD-like receptor-  
1154 associated inflammasome activation. *Immunity* *39*, 432–441.

1155 Whitney, J.C., Peterson, S.B., Kim, J., Pazos, M., Verster, A.J., Radey, M.C.,  
1156 Kulasekara, H.D., Ching, M.Q., Bullen, N.P., Bryant, D., et al. (2017). A broadly  
1157 distributed toxin family mediates contact-dependent antagonism between gram-  
1158 positive bacteria. *Elife* *6*, 1–24.

1159 Zhou, B., and Abbott, D.W. (2021). Gasdermin E permits interleukin-1 beta release  
1160 in distinct sublytic and pyroptotic phases. *Cell Rep.* *35*, 108998.

1161
